# Supplementary material for: Sugarloaf Land in south-eastern Brazil: a tropical hotspot of lowland inselberg plant diversity
Source: Biodivers Data J. 2020 Jun 19;8:e53135. doi: 10.3897/BDJ.8.e53135 (PMC7320030; doi:10.3897/BDJ.8.e53135)
Supplement: Supplementary material 1 — List of angiosperms occurring on lowland inselbergs in the Atlantic Forest, SE Brazil [file bdj-08-e53135-s001.csv]

Suppl. material 1. List of angiosperms occurring on lowland inselbergs in the Atlantic Forest, SE Brazil. Origin and life forms: followed Flora do Brasil 2020 (under construction; http://floradobrasil.jbrj.gov.br/); Threatened category: followed Centro Nacional de Conservação da Flora (http://www.cncflora.jbrj.gov.br/portal); DD = Data deficient, NT = Near Threatened, VU = Vulnerable, CR = Critic…
Family	Species	Author	Origin	Threatened category	Life forms	Source	Habitat	Reference or voucher	Link for the voucher
Alstroemeriaceae	Alstroemeria cunha	Vell.	Native	NA	Herb	A	VI	Couto et al. 2017
Amaranthaceae	Alternanthera bahiensis	Pedersen	Native	NA	Subshrub	A	VI	Pena and Alves-Araújo 2017
Amaranthaceae	Hebanthe eriantha	(Poir.) Pedersen	Native	LC	Shrub; Subshrub	A	VI	Pena and Alves-Araújo 2017
Amaryllidaceae	Hippeastrum aulicum	(Ker Gawl.) Herb.	Native	NA	Herb	C	VI	Brade, A.C. 16817 (RB)	http://jabot.jbrj.gov.br/v3/consulta.php?edtcodbarras=RB00469476&chkboxherbario[]=RB
Amaryllidaceae	Hippeastrum brasilianum	(Traub & J.L.Doran) Dutilh	Native	EN	Herb	F, C	VI	Forzza, R.C. 4704 (RB)	http://jabot.jbrj.gov.br/v3/consulta.php?edtcodbarras=494922&chkboxherbario[]=RB
Amaryllidaceae	Hippeastrum glaucescens	(Mart.) Herb.	Native	NA	Herb	EC	VI	Leal, E.S. 72 (RB)	http://jabot.jbrj.gov.br/v3/consulta.php?edtcodbarras=RB00591046&chkboxherbario[]=RB
Amaryllidaceae	Hippeastrum striatum	(Lam.) Moore	Native	EN	Herb	EC	VI, S	Leal, K.M. 1 (RB)	http://jabot.jbrj.gov.br/v3/consulta.php?edtcodbarras=678097&chkboxherbario[]=RB
Apocynaceae	Allamanda laevis	Markgr.	Native	NA	Shrub	F, C	VI, S	de Paula, L.F.A. 964 (RB)	http://jabot.jbrj.gov.br/v3/consulta.php?edtcodbarras=1115429&chkboxherbario[]=RB
Apocynaceae	Aspidosperma parvifolium	A.DC.	Native	NA	Tree	A	VI, S	Pena and Alves-Araújo 2017
Apocynaceae	Aspidosperma gomezianum	A.DC.	Native	NA	Tree	F, C	VI	Mauad, L.P. 208 (RB)	http://jabot.jbrj.gov.br/v3/consulta.php?edtcodbarras=761553&chkboxherbario[]=RB
Apocynaceae	Ditassa mucronata	Mart.	Native	NA	Liana/Vine	A	VI, S	Couto et al. 2017
Apocynaceae	Mandevilla alata	J.F.Morales & L.Kollmann	Native	NA	Liana/Vine	C	VI	Kollmann, L. 12061 (MBML)	http://reflora.jbrj.gov.br/reflora/geral/ExibeFiguraFSIUC/ExibeFiguraFSIUC.do?idFigura=230200165
Apocynaceae	Mandevilla crassinoda	(Gardner) Woodson	Native	NA	Shrub	F, C	VI	Fraga, C.N. 2840 (RB)	http://jabot.jbrj.gov.br/v3/consulta.php?edtcodbarras=581131&chkboxherbario[]=RB
Apocynaceae	Mandevilla fistulosa	M.F.Sales et al.	Native	NA	Shrub	F, C	VI	Fraga, C.N. 3793 (RB)	http://jabot.jbrj.gov.br/v3/consulta.php?edtcodbarras=RB01420271&chkboxherbario[]=RB
Apocynaceae	Mandevilla grazielae	M.F.Sales et al.	Native	NA	Shrub	F, C	VI	de Paula, L.F.A. 923 (RB)	http://jabot.jbrj.gov.br/v3/consulta.php?edtcodbarras=1115382&chkboxherbario[]=RB
Apocynaceae	Mandevilla ibitubana	J.F.Morales & L.Kollmann	Native	NA	Shrub	C	VI	Kollmann, L. 12660 (MBML)	http://reflora.jbrj.gov.br/reflora/geral/ExibeFiguraFSIUC/ExibeFiguraFSIUC.do?idFigura=230200201
Apocynaceae	Mandevilla moricandiana	(A.DC.) Woodson	Native	NA	Liana/Vine	C	VI	Kollmann, L. 7413 (RB)	http://jabot.jbrj.gov.br/v3/consulta.php?edtcodbarras=677693&chkboxherbario[]=RB
Apocynaceae	Mandevilla tenuifolia	(J.C.Mikan) Woodson	Native	NA	Liana/Vine; Subshrub	C	VI	Azevedo, L.O. 460 (RB)	http://jabot.jbrj.gov.br/v3/consulta.php?edtcodbarras=1115750&chkboxherbario[]=RB
Apocynaceae	Marsdenia macrophylla	(Humb. & Bonpl. ex Schult.) E.Fourn.	Native	NA	Liana/Vine	A	VI	Pena and Alves-Araújo 2017
Apocynaceae	Marsdenia caatingae	Morillo	Native	NA	Shrub	C	VI, S	Fraga, C.N. 1915 (RB)	http://jabot.jbrj.gov.br/v3/consulta.php?edtcodbarras=RB00521510&chkboxherbario[]=RB
Apocynaceae	Marsdenia loniceroides	(Hook.) E.Fourn.	Native	NA	Shrub	A	VI	Santos et al. 2010
Apocynaceae	Marsdenia otoniensis	Fontella & Morillo	Native	NA	Liana/Vine	C	VI	Azevedo, L.O. 463 (RB)	http://jabot.jbrj.gov.br/v3/consulta.php?edtcodbarras=RB01115753&chkboxherbario[]=RB
Apocynaceae	Oxypetalum banksii	R.Br. ex Schult.	Native	NA	Liana/Vine	F, C	VI, S	Mauad, L.P. 460 (RB)	http://jabot.jbrj.gov.br/v3/consulta.php?edtcodbarras=1157480&chkboxherbario[]=RB
Apocynaceae	Oxypetalum pilosum	Gardner	Native	NA	Liana/Vine	C	VI, S	Forzza, R.C. 5751 (RB)	http://jabot.jbrj.gov.br/v3/consulta.php?edtcodbarras=591074&chkboxherbario[]=RB
Apocynaceae	Tabernaemontana catharinensis	A.DC.	Native	NA	Shrub; Tree	A	VI	Santos et al. 2010
Araceae	Anthurium lhotzkyanum	Schott	Native	NA	Herb	C	VI	de Paula, L.F.A. 862 (RB)	http://jabot.jbrj.gov.br/v3/consulta.php?edtcodbarras=1115672&chkboxherbario[]=RB
Araceae	Anthurium coriaceum	(Graham) G.Don	Native	LC	Herb	C	VI, S	de Paula, L.F.A. 1096 (RB)	http://jabot.jbrj.gov.br/v3/consulta.php?edtcodbarras=1142595&chkboxherbario[]=RB
Araceae	Anthurium marcusianum	Theoófilo, L. Kollmann & Sakur.	Native	NA	Herb	C	VI	Kollmann, L. 10937 (RB)	http://jabot.jbrj.gov.br/v3/consulta.php?edtcodbarras=599160&chkboxherbario[]=RB
Araceae	Anthurium microphyllum	(Raf.) G.Don	Native	NA	Herb	C	VI	Cardoso, L.J.T. 1702 (RB)	http://jabot.jbrj.gov.br/v3/consulta.php?edtcodbarras=1193839&chkboxherbario[]=RB
Araceae	Anthurium minarum	Sakur. & Mayo	Native	NA	Herb	C	VI	Forzza, R.C. 8788 (RB)	http://jabot.jbrj.gov.br/v3/consulta.php?edtcodbarras=1232832&chkboxherbario[]=RB
Araceae	Anthurium mucuri	E.G.Gonç. & L.F.A. de Paula	Native	NA	Herb	C	VI	de Paula, L.F.A. 1168 (RB)	http://jabot.jbrj.gov.br/v3/consulta.php?edtcodbarras=1384854&chkboxherbario[]=RB
Araceae	Anthurium parasiticum	(Vell.) Stellfeld	Native	LC	Herb	C	VI	de Paula, L.F.A. 937 (RB)	http://jabot.jbrj.gov.br/v3/consulta.php?edtcodbarras=1115399&chkboxherbario[]=RB
Araceae	Anthurium sucrii	G.M.Barroso	Native	NA	Herb	C	VI	Mauad, L.P. 293 (RB)	http://jabot.jbrj.gov.br/v3/consulta.php?edtcodbarras=761554&chkboxherbario[]=RB
Araceae	Anthurium viridispathum	E.G.Gonç.	Native	NA	Herb	C	VI	Forzza, R.C. 5786 (RB)	http://jabot.jbrj.gov.br/v3/consulta.php?edtcodbarras=591220&chkboxherbario[]=RB
Araceae	Philodendron edmundoi	G.M.Barroso	Native	NA	Herb	F, C	VI, S	Kollmann, L. 10691 (RB)	http://jabot.jbrj.gov.br/v3/consulta.php?edtcodbarras=RB00522067&chkboxherbario[]=RB
Arecaceae	Allagoptera arenaria	(Gomes) Kuntze	Native	LC	Herb	A	VI, S	Pena and Alves-Araújo 2017
Arecaceae	Syagrus picrophylla	Barb.Rodr.	Native	VU	Palm tree	C	VI	de Paula, L.F.A. 1050 (RB)	http://jabot.jbrj.gov.br/v3/consulta.php?edtcodbarras=1157449&chkboxherbario[]=RB
Arecaceae	Syagrus romanzoffiana	(Cham.) Glassman	Native	LC	Palm tree	F, EC	VI, S	Uller, H.F. s.n. (RB 615525)	http://jabot.jbrj.gov.br/v3/consulta.php?edtcodbarras=918995&chkboxherbario[]=RB
Arecaceae	Syagrus ruschiana	(Bondar) Glassman	Native	VU	Palm tree	F, C	VI, S	Forzza, R.C. 8770 (RB)	http://jabot.jbrj.gov.br/v3/consulta.php?edtcodbarras=1115537&chkboxherbario[]=RB
Aristolochiaceae	Aristolochia gracilipedunculata	F.González	Native	NA	Liana/Vine	F, A	VI, S	Pena and Alves-Araújo 2017
Asparagaceae	Furcraea foetida	(L.) Haw.	Naturalized	NA	Herb	A	VI, S	Meirelles et al. 1999
Asteraceae	Achyrocline satureioides	(Lam.) DC.	Native	NA	Herb	C	VI	de Paula, L.F.A. 871 (RB)	http://jabot.jbrj.gov.br/v3/consulta.php?edtcodbarras=1115681&chkboxherbario[]=RB
Asteraceae	Ageratum conyzoides	L.	Native	NA	Herb; Subshrub	A	VI, S	Pena and Alves-Araújo 2017
Asteraceae	Baccharis glutinosa	Pers.	Native	NA	Subshrub	C	VI	de Paula, L.F.A. 1046 (RB)	http://jabot.jbrj.gov.br/v3/consulta.php?edtcodbarras=1157444&chkboxherbario[]=RB
Asteraceae	Baccharis platypoda	DC.	Native	NA	Shrub; Subshrub	F, A	VI	Couto et al. 2017
Asteraceae	Baccharis salicifolia	(Ruiz & Pav.) Pers.	Native	NA	Shrub	C	VI	de Paula, L.F.A. 1138 (RB)	http://jabot.jbrj.gov.br/v3/consulta.php?edtcodbarras=1232787&chkboxherbario[]=RB
Asteraceae	Baccharis serrulata	(Lam.) Pers.	Native	NA	Subshrub	F, C	VI	Mauad, L.P. 246 (RB)	http://jabot.jbrj.gov.br/v3/consulta.php?edtcodbarras=761555&chkboxherbario[]=RB
Asteraceae	Baccharis trinervis	Pers.	Native	NA	Liana/Vine; Subshrub	F, EC	VI	Sousa, L.O.F. 158 (RB)	http://jabot.jbrj.gov.br/v3/consulta.php?edtcodbarras=24332&chkboxherbario[]=RB
Asteraceae	Barrosoa apiculata	(Gardner) R.M.King & H.Rob.	Native	LC	Herb	C	VI	Mauad, L.P. 273 (RB)	http://jabot.jbrj.gov.br/v3/consulta.php?edtcodbarras=761556&chkboxherbario[]=RB
Asteraceae	Blainvillea acmella	(L.) Philipson	Native	NA	Herb	EC	VI	Silva, R.C.C. 7 (RB)	http://rb.jbrj.gov.br/v2/templaterb2.php?colbot=RB&codtestemunho=533345&arquivo=00533345.jpg
Asteraceae	Campuloclinium macrocephalum	(Less.) DC.	Native	NA	Herb	EC	VI	Lucio, K.A. 25 (RB)	http://jabot.jbrj.gov.br/v3/consulta.php?edtcodbarras=560408&chkboxherbario[]=RB
Asteraceae	Clibadium armanii	(Balb.) Sch.Bip. ex O.E.Schulz	Naturalized	NA	Shrub	A	VI, S	Couto et al. 2017
Asteraceae	Cololobus argenteus	M.Monge & Semir	Native	NA	Subshrub	C	VI	Pinto Junior, H.V. 156 (SAMES)	http://jabot.jbrj.gov.br/v3/visualizadorimagem.php?siglacolbotorigem=SAMES&codigobarras=SAMES01227
Asteraceae	Cololobus longiangustatus	( G.M.Barroso ) H.Rob.	Native	EN	Subshrub	C	VI	Forzza, R.C. 7514 (RB)	http://jabot.jbrj.gov.br/v3/consulta.php?edtcodbarras=810029&chkboxherbario[]=RB
Asteraceae	Cololobus rupestris	(Gardner) H.Rob.	Native	EN	Shrub	F, C	VI	Fraga, C.N. 3791 (RB)	http://jabot.jbrj.gov.br/v3/consulta.php?edtcodbarras=RB01420269&chkboxherbario[]=RB
Asteraceae	Cyanthillium cinereum	(L.) H.Rob.	Native	NA	Herb	EC	VI	Dan, M.L. ita032 (RB)	http://jabot.jbrj.gov.br/v3/consulta.php?edtcodbarras=588144&chkboxherbario[]=RB
Asteraceae	Cyrtocymura scorpioides	(Lam.) H.Rob.	Native	NA	Subshrub	C	VI, S	de Paula, L.F.A. 1113 (RB)	http://jabot.jbrj.gov.br/v3/consulta.php?edtcodbarras=1232762&chkboxherbario[]=RB
Asteraceae	Emilia fosbergii	Nicolson	Native	NA	Herb	A	VI, S	Meirelles et al. 1999
Asteraceae	Emilia sonchifolia	(L.) DC. ex Wight	Native	NA	Herb	EC	VI	Barros, A.A.M. 4299 (RB)	http://jabot.jbrj.gov.br/v3/consulta.php?edtcodbarras=RB01113529&chkboxherbario[]=RB
Asteraceae	Eremanthus crotonoides	(DC.) Sch.Bip.	Native	LC	Tree	A	VI	Couto et al. 2017
Asteraceae	Eremanthus erythropappus	(DC.) MacLeish	Native	NA	Tree	A	VI	Meirelles et al. 1999
Asteraceae	Gorceixia decurrens	Baker	Native	NA	Tree	C	VI, S	de Paula, L.F.A. 886 (RB)	http://jabot.jbrj.gov.br/v3/consulta.php?edtcodbarras=1115696&chkboxherbario[]=RB
Asteraceae	Lepidaploa cotoneaster	(Willd. ex Spreng.) H.Rob.	Native	LC	Shrub	C	VI	Azevedo, L.O. 481 (RB)	http://jabot.jbrj.gov.br/v3/consulta.php?edtcodbarras=1115771&chkboxherbario[]=RB
Asteraceae	Lepidaploa sororia	(DC.) H.Rob.	Native	NA	Shrub	C	VI	Fraga, C.N. 1909 (RB)	http://jabot.jbrj.gov.br/v3/consulta.php?edtcodbarras=RB00521504&chkboxherbario[]=RB
Asteraceae	Lessingianthus squamosus	M.Monge & Semir	Native	NA	Shrub	EC	VI	Fontana, A.P. 1145 (MBML)	http://reflora.jbrj.gov.br/reflora/geral/ExibeFiguraFSIUC/ExibeFiguraFSIUC.do?idFigura=230221681
Asteraceae	Mikania lanuginosa	DC.	Native	NA	Liana/Vine	C	VI	Forzza, R.C. 7529 (RB)	http://jabot.jbrj.gov.br/v3/consulta.php?edtcodbarras=810043&chkboxherbario[]=RB
Asteraceae	Mikania micrantha	Kunth	Native	NA	Liana/Vine	F, A	VI	Couto et al. 2017
Asteraceae	Mikania microcephala	DC.	Native	NA	Liana/Vine	C	VI	de Paula, L.F.A. 396 (BHCB)
Asteraceae	Praxelis clematidea	(Griseb.) R.M.King & H.Rob.	Native	NA	Subshrub	EC	VI	Guimarães, E.F. 141 (RB)	http://jabot.jbrj.gov.br/v3/consulta.php?edtcodbarras=427166&chkboxherbario[]=RB
Asteraceae	Tridax procumbens	L.	Native	NA	Herb	EC	VI	Barbosa-Silva, R.G. 503 (RB)	http://jabot.jbrj.gov.br/v3/consulta.php?edtcodbarras=1157412&chkboxherbario[]=RB
Asteraceae	Wunderlichia azulensis	Maguire & G.M.Barroso	Native	EN	Shrub; Tree	F, C	VI	de Paula, L.F.A. 131 (RB)	http://jabot.jbrj.gov.br/v3/consulta.php?edtcodbarras=RB00798997&chkboxherbario[]=RB
Begoniaceae	Begonia aconitifolia	A.DC.	Native	NA	Subshrub	C	VI	Dan, M.L. 90 (MBML)	http://floradobrasil.jbrj.gov.br/reflora/geral/ExibeFiguraFSIUC/ExibeFiguraFSIUC.do?idFigura=230202643
Begoniaceae	Begonia aguiabrancensis	L.Kollmann	Native	NA	Subshrub	C	VI	de Paula, L.F.A. 1104 (RB)	http://jabot.jbrj.gov.br/v3/consulta.php?edtcodbarras=1232753&chkboxherbario[]=RB
Begoniaceae	Begonia albidula	Brade	Native	EN	Subshrub	C	VI	Kollmann, L. 12065 (MBML)	http://floradobrasil.jbrj.gov.br/reflora/geral/ExibeFiguraFSIUC/ExibeFiguraFSIUC.do?idFigura=230223939
Begoniaceae	Begonia callosa	L.Kollmann	Native	NA	Subshrub	C	VI	Kollmann, L. 8388 (RB)	http://jabot.jbrj.gov.br/v3/consulta.php?edtcodbarras=538145&chkboxherbario[]=RB
Begoniaceae	Begonia cucullata	Willd.	Native	NA	Herb	A	VI	Couto et al. 2017
Begoniaceae	Begonia curtii	L.B.Sm. & B.G.Schub.	Native	VU	Subshrub	EC	VI, S	Barbosa-Silva, R.G. 514 (RB)	http://jabot.jbrj.gov.br/v3/consulta.php?edtcodbarras=1157423&chkboxherbario[]=RB
Begoniaceae	Begonia goldingiana	L.Kollmann & A.P.Fontana	Native	NA	Subshrub	C	VI, S	Kollmann, L. 11571 (RB)	http://jabot.jbrj.gov.br/v3/consulta.php?edtcodbarras=616713&chkboxherbario[]=RB
Begoniaceae	Begonia hirtella	Link	Native	LC	Herb	C	VI, S	Cardoso, L.J.T. 31 (RB)	http://jabot.jbrj.gov.br/v3/consulta.php?edtcodbarras=420055&chkboxherbario[]=RB
Begoniaceae	Begonia ibitiocensis	E.L.Jacques & Mamede	Native	EN	Subshrub	A	VI	Pena and Alves-Araújo 2017
Begoniaceae	Begonia kuhlmannii	Brade	Native	EN	Subshrub	C	VI	Kollmann, L. 11475 (RB)	http://jabot.jbrj.gov.br/v3/consulta.php?edtcodbarras=RB00557418&chkboxherbario[]=RB
Begoniaceae	Begonia lossiae	L.Kollmann	Native	NA	Subshrub	C	VI	Kollmann, L. 10679 (RB)	http://jabot.jbrj.gov.br/v3/consulta.php?edtcodbarras=RB00522054&chkboxherbario[]=RB
Begoniaceae	Begonia maculata	Raddi	Native	NA	Subshrub	EC	VI, S	Braga, J.M.A. 963 (RB)	http://jabot.jbrj.gov.br/v3/consulta.php?edtcodbarras=679812&chkboxherbario[]=RB
Begoniaceae	Begonia novalombardiensis	L.Kollmann	Native	NA	Subshrub	C	VI	Kollmann, L. 5822(RB)	http://jabot.jbrj.gov.br/v3/consulta.php?edtcodbarras=536715&chkboxherbario[]=RB
Begoniaceae	Begonia obdeltata	Gregorio & E.L.Jacques	Native	NA	Subshrub	EC	VI, S	Amorim, A. 5388 (RB)	http://jabot.jbrj.gov.br/v3/consulta.php?edtcodbarras=438192&chkboxherbario[]=RB
Begoniaceae	Begonia pachypoda	L.Kollmann & Peixoto	Native	NA	Subshrub	C	VI	Kollmann, L. 11670 (RB)	http://jabot.jbrj.gov.br/v3/consulta.php?edtcodbarras=807291&chkboxherbario[]=RB
Begoniaceae	Begonia reniformis	Dryand.	Native	NA	Subshrub	C	VI, S	Forzza, R.C. 8811 (RB)	http://jabot.jbrj.gov.br/v3/consulta.php?edtcodbarras=1232854&chkboxherbario[]=RB
Begoniaceae	Begonia sanguinea	Raddi	Native	NA	Subshrub	EC	VI, S	Braga, J.M.A. 17-074 (RB)	http://jabot.jbrj.gov.br/v3/consulta.php?edtcodbarras=1365934&chkboxherbario[]=RB
Begoniaceae	Begonia ulmifolia	Willd.	Native	LC	Subshrub	EC	VI	Fontana, A.P. 5815 (RB)	http://jabot.jbrj.gov.br/v3/consulta.php?edtcodbarras=RB00557324&chkboxherbario[]=RB
Begoniaceae	Begonia venosa	Skan ex Hook.	Native	CR	Subshrub	EC	VI	Poli, L.P. 74 (MBML)	http://floradobrasil.jbrj.gov.br/reflora/geral/ExibeFiguraFSIUC/ExibeFiguraFSIUC.do?idFigura=230217679
Bignoniaceae	Fridericia rego	(Vell.) L.G.Lohmann	Native	NA	Liana/Vine	EC	VI, S	Braga, J.M.A. 3322 (RB)	http://jabot.jbrj.gov.br/v3/consulta.php?edtcodbarras=679178&chkboxherbario[]=RB
Bignoniaceae	Fridericia subincana	(Mart.) L.G.Lohmann	Native	NA	Liana/Vine	C	VI, S	Mauad, L.P. 345 (RB)	http://jabot.jbrj.gov.br/v3/consulta.php?edtcodbarras=1115592&chkboxherbario[]=RB
Bignoniaceae	Handroanthus selachidentatus	(A.H.Gentry) S.Grose	Native	NT	Tree	A	VI	Pena and Alves-Araújo 2017
Bignoniaceae	Jacaranda jasminoides	(Thunb.) Sandwith	Native	NA	Tree	C	VI	Azevedo, L.O. 477 (RB)	http://jabot.jbrj.gov.br/v3/consulta.php?edtcodbarras=1115767&chkboxherbario[]=RB
Bignoniaceae	Jacaranda puberula	Cham.	Native	LC	Tree	C	VI	Mauad, L.P. 325 (RB)	http://jabot.jbrj.gov.br/v3/consulta.php?edtcodbarras=1115568&chkboxherbario[]=RB
Bignoniaceae	Tabebuia reticulata	A.H.Gentry	Native	NA	Tree	F, C	VI	de Paula, L.F.A. 916 (RB)	http://jabot.jbrj.gov.br/v3/consulta.php?edtcodbarras=1115374&chkboxherbario[]=RB
Boraginaceae	Tournefortia salicifolia	A.DC.	Native	NA	Shrub; Subshrub	EC	VI	Barros, A.A.M. 2112 (RB)	http://jabot.jbrj.gov.br/v3/consulta.php?edtcodbarras=527620&chkboxherbario[]=RB
Bromeliaceae	Aechmea gurkeniana	E.Pereira & Moutinho	Native	NA	Herb	F, EC	VI, S	Vervloet, R.R. 3361 (MBML)	http://reflora.jbrj.gov.br/reflora/geral/ExibeFiguraFSIUC/ExibeFiguraFSIUC.do?idFigura=230211487
Bromeliaceae	Aechmea nudicaulis	(L.) Griseb.	Native	LC	Herb	F, A	VI	Couto et al. 2017
Bromeliaceae	Aechmea sphaerocephala	Baker	Native	EN	Herb	F, EC	VI, S	Leme, E.M.C. 4930 (RB)	http://jabot.jbrj.gov.br/v3/consulta.php?edtcodbarras=RB01207290&chkboxherbario[]=RB
Bromeliaceae	Alcantarea abacta	Versieux	Native	NA	Herb	F, EC	VI	Versieux, L.M. 491 (UFRN)	http://reflora.jbrj.gov.br/reflora/geral/ExibeFiguraFSIUC/ExibeFiguraFSIUC.do?idFigura=100430541
Bromeliaceae	Alcantarea burle-marxii	(Leme) J.R.Grant	Native	NA	Herb	F, EC	VI	Versieux, L.M. 420 (RB)	http://jabot.jbrj.gov.br/v3/consulta.php?edtcodbarras=RB00605848&chkboxherbario[]=RB
Bromeliaceae	Alcantarea cerosa	Leme, A.P.Fontana & O.A.B.Ribeiro	Native	NA	Herb	F, EC	VI	Leme, E.M.C. 5602 (RB)	http://jabot.jbrj.gov.br/v3/consulta.php?edtcodbarras=1395326&chkboxherbario[]=RB
Bromeliaceae	Alcantarea distractila	Leme & C.C.Paula	Native	NA	Herb	F, EC	VI	Leme, E.M.C. 5601 (HB)
Bromeliaceae	Alcantarea extensa	(L.B.Sm.) J.R.Grant	Native	NA	Herb	F, C	VI	Forzza, R.C. 7595 (RB)	http://jabot.jbrj.gov.br/v3/consulta.php?edtcodbarras=RB00810110&chkboxherbario[]=RB
Bromeliaceae	Alcantarea galactea	Coser & Versieux	Native	NA	Herb	F, EC	VI	Coser, T.S. 500 (RB)	http://jabot.jbrj.gov.br/v3/consulta.php?edtcodbarras=RB00768423&chkboxherbario[]=RB
Bromeliaceae	Alcantarea geniculata	(Wawra) J.R.Grant	Native	EN	Herb	F, A	VI	Meirelles et al. 1999
Bromeliaceae	Alcantarea glaucifolia	Leme & L.Kollmann	Native	NA	Herb	EC	VI	Leme, E.M.C. 7799 (RB)	http://jabot.jbrj.gov.br/v3/consulta.php?edtcodbarras=1128166&chkboxherbario[]=RB
Bromeliaceae	Alcantarea glaziouana	(Leme) J.R.Grant	Native	EN	Herb	F, C	VI	Fraga, C.N. 2906 (RB)	http://jabot.jbrj.gov.br/v3/consulta.php?edtcodbarras=603472&chkboxherbario[]=RB
Bromeliaceae	Alcantarea heloisae	J.R.Grant	Native	NA	Herb	C	VI	Forzza, R.C. 4159 (RB)	http://jabot.jbrj.gov.br/v3/consulta.php?edtcodbarras=334292&chkboxherbario[]=RB
Bromeliaceae	Alcantarea imperialis	(Carriere) Harms	Native	VU	Herb	F, C	VI	Forzza, R.C. 2080 (MBM)	http://reflora.jbrj.gov.br/reflora/geral/ExibeFiguraFSIUC/ExibeFiguraFSIUC.do?idFigura=229544903
Bromeliaceae	Alcantarea lanceopetala	Leme	Native	NA	Herb	F, EC	VI	Vasconcellos, N. s.n. (RB 318735)	http://jabot.jbrj.gov.br/v3/consulta.php?edtcodbarras=874698&chkboxherbario[]=RB
Bromeliaceae	Alcantarea longibracteata	Leme & Fraga	Native	NA	Herb	F, C	VI	Fraga, C.N. 3788 (RB)	http://jabot.jbrj.gov.br/v3/consulta.php?edtcodbarras=1420266&chkboxherbario[]=RB
Bromeliaceae	Alcantarea nahoumii	(Leme) J.R.Grant	Native	VU	Herb	F, EC	VI	Martinelli, G. 20751 (RB)	http://jabot.jbrj.gov.br/v3/consulta.php?edtcodbarras=1402040&chkboxherbario[]=RB
Bromeliaceae	Alcantarea nigripetala	Leme & L.Kollmann	Native	NA	Herb	F, EC	VI	Leme, E.M.C. 7922 (RB)	http://jabot.jbrj.gov.br/v3/consulta.php?edtcodbarras=1407669&chkboxherbario[]=RB
Bromeliaceae	Alcantarea pataxoana	Versieux	Native	NA	Herb	F, EC	VI	Vasconcellos, N. 221 (RB)	http://jabot.jbrj.gov.br/v3/consulta.php?edtcodbarras=629819&chkboxherbario[]=RB
Bromeliaceae	Alcantarea patriae	Versieux & Wand.	Native	NA	Herb	F, C	VI	Forzza, R.C. 8808 (RB)	http://jabot.jbrj.gov.br/v3/consulta.php?edtcodbarras=1232851&chkboxherbario[]=RB
Bromeliaceae	Alcantarea regina	(Vell.) Harms	Native	NA	Herb	F, EC	VI	Versieux, L.M. 267 (RB)	http://jabot.jbrj.gov.br/v3/consulta.php?edtcodbarras=606375&chkboxherbario[]=RB
Bromeliaceae	Alcantarea roberto-kautskyi	Leme	Native	NT	Herb	F, EC	VI	Zaslawski s.n. (RB 493755)	http://jabot.jbrj.gov.br/v3/consulta.php?edtcodbarras=RB00583574&chkboxherbario[]=RB
Bromeliaceae	Alcantarea simplicisticha	Leme & A.P.Fontana	Native	NA	Herb	F, C	VI	de Paula, L.F.A. 1163 (RB)	http://jabot.jbrj.gov.br/v3/consulta.php?edtcodbarras=1384858&chkboxherbario[]=RB
Bromeliaceae	Alcantarea trepida	Versieux & Wand.	Native	NA	Herb	F, EC	VI	Fontana, A.P. 5241 (RB)	http://jabot.jbrj.gov.br/v3/consulta.php?edtcodbarras=RB00528288&chkboxherbario[]=RB
Bromeliaceae	Alcantarea turgida	Versieux & Wand.	Native	NA	Herb	C	VI	de Paula, L.F.A. 1077 (RB)	http://jabot.jbrj.gov.br/v3/consulta.php?edtcodbarras=1115487&chkboxherbario[]=RB
Bromeliaceae	Billbergia pyramidalis	(Sims) Lindl.	Native	DD	Herb	EC	VI, S	Carauta, J.P.P. 2851 (RB)	http://jabot.jbrj.gov.br/v3/consulta.php?edtcodbarras=145038&chkboxherbario[]=RB
Bromeliaceae	Dyckia bracteata	(Wittm.) Mez	Native	NA	Herb	A	VI	Pena and Alves-Araújo 2017
Bromeliaceae	Dyckia espiritosantensis	Leme & A.P.Fontana	Native	NA	Herb	F, EC	VI	Leme, E.M.C. 6930 (RB)	http://jabot.jbrj.gov.br/v3/consulta.php?edtcodbarras=595261&chkboxherbario[]=RB
Bromeliaceae	Dyckia sordida	Baker	Native	NA	Herb	C	VI	Forzza, R.C. 6042 (RB)	http://jabot.jbrj.gov.br/v3/consulta.php?edtcodbarras=RB00621464&chkboxherbario[]=RB
Bromeliaceae	Encholirium gracile	L.B.Sm.	Native	EN	Herb	F, C	VI	Belém, R.P. 1620 (UB)	http://reflora.jbrj.gov.br/reflora/geral/ExibeFiguraFSIUC/ExibeFiguraFSIUC.do?idFigura=100352605
Bromeliaceae	Encholirium horridum	L.B.Sm.	Native	EN	Herb	F, C	VI	de Paula, L.F.A. 1071 (RB)	http://jabot.jbrj.gov.br/v3/consulta.php?edtcodbarras=1115481&chkboxherbario[]=RB
Bromeliaceae	Neoregelia ampullacea	(E.Morren) L.B.Sm.	Native	NA	Herb	F, EC	VI, S	Ferreira, V.F. 2114 (RB)	http://jabot.jbrj.gov.br/v3/consulta.php?edtcodbarras=240424&chkboxherbario[]=RB
Bromeliaceae	Neoregelia cruenta	(R.Graham) L.B.Sm.	Native	LC	Herb	F, A	VI	Meirelles et al. 1999
Bromeliaceae	Neoregelia dactyloflammans	Leme & L.Kollmann	Native	NA	Herb	EC	VI	Leme, E.M.C. 7878 (RB)	http://jabot.jbrj.gov.br/v3/consulta.php?edtcodbarras=609204&chkboxherbario[]=RB
Bromeliaceae	Neoregelia retrorsa	Leme & L.Kollmann	Native	NA	Herb	EC	VI, S	Leme, E.M.C. 7371 (RB)	http://jabot.jbrj.gov.br/v3/consulta.php?edtcodbarras=768332&chkboxherbario[]=RB
Bromeliaceae	Neoregelia sarmentosa	(Regel) L.B.Sm.	Native	LC	Herb	EC	VI, S	Braga, J.M.A. 5104 (RB)	http://jabot.jbrj.gov.br/v3/consulta.php?edtcodbarras=676809&chkboxherbario[]=RB
Bromeliaceae	Orthophytum alvimii	W.Weber	Native	NA	Herb	EC	VI	Forzza, R.C. 5774 (RB)	http://jabot.jbrj.gov.br/v3/consulta.php?edtcodbarras=RB00591212&chkboxherbario[]=RB
Bromeliaceae	Orthophytum benzingii	Leme & H.Luther	Native	NA	Herb	F, EC	VI	Louzada, R.B. 141 (RB)	http://jabot.jbrj.gov.br/v3/consulta.php?edtcodbarras=RB00801198&chkboxherbario[]=RB
Bromeliaceae	Orthophytum buranhense	Leme & A.P.Fontana	Native	NA	Herb	F, EC	VI	Leme, E.M.C. 7775 (RB)	http://jabot.jbrj.gov.br/v3/consulta.php?edtcodbarras=515890&chkboxherbario[]=RB
Bromeliaceae	Orthophytum compactum	L.B.Sm.	Native	NA	Herb	F, C	VI	de Paula, L.F.A. 932 (RB)	http://jabot.jbrj.gov.br/v3/consulta.php?edtcodbarras=1115392&chkboxherbario[]=RB
Bromeliaceae	Orthophytum duartei	L.B.Sm.	Native	EN	Herb	F, EC	VI	Duarte, A.P. 3910 (RB)	http://jabot.jbrj.gov.br/v3/consulta.php?edtcodbarras=562504&chkboxherbario[]=RB
Bromeliaceae	Orthophytum estevesii	(Rauh) Leme	Native	DD	Herb	F, EC	VI	Gastin s.n. (HB 89829)
Bromeliaceae	Orthophytum falconii	Leme	Native	NA	Herb	F, EC	VI, S	Belém, R.P. 3614 (NY)	http://reflora.jbrj.gov.br/reflora/geral/ExibeFiguraFSIUC/ExibeFiguraFSIUC.do?idFigura=228277785-
Bromeliaceae	Orthophytum fosterianum	L.B.Sm.	Native	EN	Herb	F, EC	VI, S	Fontana, A.P. 2323 (RB)	http://jabot.jbrj.gov.br/v3/consulta.php?edtcodbarras=RB00582233&chkboxherbario[]=RB
Bromeliaceae	Orthophytum grossiorum	Leme & C.C.Paula	Native	EN	Herb	F, EC	VI	Siqueira-Filho, J.A. 2854 (HVASF)
Bromeliaceae	Orthophytum guaratingense	Leme & L.Kollmann	Native	NA	Herb	F, EC	VI	Leme, E.M.C. 7784 (RB)
Bromeliaceae	Orthophytum gurkenii	Hutchison	Native	NA	Herb	F, EC	VI	Louzada, R.B. 133 (RB)	http://jabot.jbrj.gov.br/v3/consulta.php?edtcodbarras=RB00801160&chkboxherbario[]=RB
Bromeliaceae	Orthophytum horridum	Leme	Native	NA	Herb	F, C	VI, S	de Paula, L.F.A. 975 (RB)	http://jabot.jbrj.gov.br/v3/consulta.php?edtcodbarras=RB01115442&chkboxherbario[]=RB
Bromeliaceae	Orthophytum lanuginosum	Leme & C.C.Paula	Native	NA	Herb	F, EC	VI	Kollmann, L. 11727 (MBML)	http://floradobrasil.jbrj.gov.br/reflora/geral/ExibeFiguraFSIUC/ExibeFiguraFSIUC.do?idFigura=230214147
Bromeliaceae	Orthophytum leprosum	(Mez) Mez	Native	NA	Herb	F, EC	VI, S	Martinelli, G. 7733 (RB)	http://jabot.jbrj.gov.br/v3/consulta.php?edtcodbarras=780609&chkboxherbario[]=RB
Bromeliaceae	Orthophytum magalhaesii	L.B.Sm.	Native	EN	Herb	F, C	VI	de Paula, L.F.A. 1082 (RB)	http://jabot.jbrj.gov.br/v3/consulta.php?edtcodbarras=1115492&chkboxherbario[]=RB
Bromeliaceae	Orthophytum pseudovagans	Leme & L.Kollmann	Native	NA	Herb	F, EC	VI	Demuner, V. 2270 (MBML)	http://jb060.jbrj.gov.br/reflora/geral/ExibeFiguraFSIUC/ExibeFiguraFSIUC.do?idFigura=230207751
Bromeliaceae	Orthophytum rubiginosum	Leme	Native	NA	Herb	F, EC	VI	Louzada, R.B. 132 (RB)	http://jabot.jbrj.gov.br/v3/consulta.php?edtcodbarras=812666&chkboxherbario[]=RB
Bromeliaceae	Orthophytum sucrei	H.Luther	Native	NA	Herb	F, EC	VI	Louzada, R.B. 136 (RB)	http://jabot.jbrj.gov.br/v3/consulta.php?edtcodbarras=801200&chkboxherbario[]=RB
Bromeliaceae	Orthophytum teofilo-otonense	Leme & L.Kollmann	Native	NA	Herb	F, EC	VI	Leme, E.M.C. 7919 (RB)	http://jabot.jbrj.gov.br/v3/consulta.php?edtcodbarras=595256&chkboxherbario[]=RB
Bromeliaceae	Orthophytum zanonii	Leme	Native	CR	Herb	F, C	VI	Forzza, R.C. 7720 (RB)	http://jabot.jbrj.gov.br/v3/consulta.php?edtcodbarras=856218&chkboxherbario[]=RB
Bromeliaceae	Pitcairnia abyssicola	Leme & L.Kollmann	Native	NA	Herb	F, A	VI	Couto et al. 2017
Bromeliaceae	Pitcairnia albiflos	Herb.	Native	EN	Herb	F, C	VI	Forzza, R.C. 4160 (RB)	http://jabot.jbrj.gov.br/v3/consulta.php?edtcodbarras=RB00448965&chkboxherbario[]=RB
Bromeliaceae	Pitcairnia azouryi	Martinelli & Forzza	Native	NA	Herb	F, EC	VI	Martinelli, G. 15977 (RB)	http://jabot.jbrj.gov.br/v3/consulta.php?edtcodbarras=566304&chkboxherbario[]=RB
Bromeliaceae	Pitcairnia barbatostigma	Leme & A.P.Fontana	Native	NA	Herb	F, C	VI	Forzza, R.C. 8753 (RB)	http://jabot.jbrj.gov.br/v3/consulta.php?edtcodbarras=1115517&chkboxherbario[]=RB
Bromeliaceae	Pitcairnia capixaba	Leme & Fraga	Native	NA	Herb	F, C	VI	Forzza, R.C. 7635 (RB)	http://jabot.jbrj.gov.br/v3/consulta.php?edtcodbarras=810094&chkboxherbario[]=RB
Bromeliaceae	Pitcairnia carinata	Mez	Native	NA	Herb	A	VI	Pena and Alves-Araújo 2017
Bromeliaceae	Pitcairnia decidua	L.B.Sm.	Native	EN	Herb	F, C	VI	Forzza, R.C. 7525 (RB)	http://jabot.jbrj.gov.br/v3/consulta.php?edtcodbarras=RB00810039&chkboxherbario[]=RB
Bromeliaceae	Pitcairnia diversifolia	Leme & A.P.Fontana	Native	NA	Herb	F, EC	VI	Fontana, A.P. 3389 (RB)	http://jabot.jbrj.gov.br/v3/consulta.php?edtcodbarras=557860&chkboxherbario[]=RB
Bromeliaceae	Pitcairnia encholirioides	L.B.Sm.	Native	EN	Herb	F, C	VI	Forzza, R.C. 4158 (RB)	http://jabot.jbrj.gov.br/v3/consulta.php?edtcodbarras=334993&chkboxherbario[]=RB
Bromeliaceae	Pitcairnia flammea	Lindl.	Native	NA	Herb	F, C	VI	Forzza, R.C. 8812 (RB)	http://jabot.jbrj.gov.br/v3/consulta.php?edtcodbarras=1232855&chkboxherbario[]=RB
Bromeliaceae	Pitcairnia glauca	Leme & A.P.Fontana	Native	NA	Herb	F, C	VI	de Paula, L.F.A. 398 (RB)	http://jabot.jbrj.gov.br/v3/consulta.php?edtcodbarras=754091&chkboxherbario[]=RB
Bromeliaceae	Pitcairnia glaziovii	Baker	Native	EN	Herb	F, A	VI	Couto et al. 2017
Bromeliaceae	Pitcairnia staminea	G.Lodd.	Native	NA	Herb	F, C	VI	Cardoso, L.J.T. 132 (RB)	http://jabot.jbrj.gov.br/v3/consulta.php?edtcodbarras=RB00289100&chkboxherbario[]=RB
Bromeliaceae	Quesnelia quesneliana	(Brongn.) L.B.Sm.	Native	NA	Herb	EC	VI, S	Braga, J.M.A. 3576 (RB)	http://jabot.jbrj.gov.br/v3/consulta.php?edtcodbarras=677302&chkboxherbario[]=RB
Bromeliaceae	Stigmatodon amadoi	(Leme) Leme, G.K.Br. & Barfuss	Native	NA	Herb	F, EC	VI	Colnago, E. s.n. (RB 772688)	http://jabot.jbrj.gov.br/v3/consulta.php?edtcodbarras=RB01395327&chkboxherbario[]=RB
Bromeliaceae	Stigmatodon apparicianus	(E. Pereira & Reitz) Leme, G.K.Br. & Barfuss	Native	NA	Herb	C	VI	de Paula, L.F.A. 961 (RB)	http://jabot.jbrj.gov.br/v3/consulta.php?edtcodbarras=1115426&chkboxherbario[]=RB
Bromeliaceae	Stigmatodon belloi	(Leme) Leme, G.K.Br. & Barfuss	Native	NA	Herb	F, EC	VI	Leme, E.M.C. 1138 (RB)	http://jabot.jbrj.gov.br/v3/consulta.php?edtcodbarras=287266&chkboxherbario[]=RB
Bromeliaceae	Stigmatodon bifidus	(Leme & L. Kollmann) Leme, G.K.Br. & Barfuss	Native	NA	Herb	F, EC	VI	Leme, E.M.C. 7368 (RB)	http://jabot.jbrj.gov.br/v3/consulta.php?edtcodbarras=874692&chkboxherbario[]=RB
Bromeliaceae	Stigmatodon brassicoides	(Baker) Leme, G.K.Br. & Barfuss	Native	NA	Herb	F, EC	VI	Baez, C. 536 (RB)	http://jabot.jbrj.gov.br/v3/consulta.php?edtcodbarras=1119294&chkboxherbario[]=RB
Bromeliaceae	Stigmatodon euclidianus	(Leme & G.K.Br.) Leme, G.K.Br. & Barfuss	Native	NA	Herb	F, EC	VI	Colnago, E. s.n. (RB 477704)	http://jabot.jbrj.gov.br/v3/consulta.php?edtcodbarras=553827&chkboxherbario[]=RB
Bromeliaceae	Stigmatodon funebris	(L.B.Sm.) Leme, G.K.Br. & Barfuss	Native	NA	Herb	F, EC	VI	Leme, E.M.C. 7876 (RB)	http://jabot.jbrj.gov.br/v3/consulta.php?edtcodbarras=583740&chkboxherbario[]=RB
Bromeliaceae	Stigmatodon goniorachis	(Baker) Leme, G.K.Br. & Barfuss	Native	NA	Herb	F, C	VI	Cardoso, L.J.T. 155 (RB)	http://jabot.jbrj.gov.br/v3/consulta.php?edtcodbarras=488548&chkboxherbario[]=RB
Bromeliaceae	Stigmatodon harrylutheri	(Leme & G.K.Br.) Leme, G.K.Br. & Barfuss	Native	NA	Herb	F, EC	VI	Leme, E.M.C. 4084 (HB)
Bromeliaceae	Stigmatodon magnibracteatus	(Leme & L.Kollmann) Leme, G.K.Br. & Barfuss	Native	NA	Herb	F, EC	VI	Leme, E.M.C. 7357 (RB)	http://jabot.jbrj.gov.br/v3/consulta.php?edtcodbarras=874652&chkboxherbario[]=RB
Bromeliaceae	Stigmatodon multifoliatus	(Leme & G.K.Br) Leme, G.K.Br. & Barfuss	Native	NA	Herb	F, EC	VI	Oliviera, R. s.n. (RB 495804)	http://jabot.jbrj.gov.br/v3/consulta.php?edtcodbarras=586879&chkboxherbario[]=RB
Bromeliaceae	Stigmatodon plurifolius	(Leme) Leme, G.K.Br. & Barfuss	Native	NA	Herb	C	VI	Forzza, R.C. 7804 (RB)	http://jabot.jbrj.gov.br/v3/consulta.php?edtcodbarras=907039&chkboxherbario[]=RB
Bromeliaceae	Stigmatodon sanctateresensis	(Leme & L.Kollmann) Leme, G.K.Br. & Barfuss	Native	NA	Herb	F, C	VI	Kollmann, L. 4350 (MBML)	http://reflora.jbrj.gov.br/reflora/geral/ExibeFiguraFSIUC/ExibeFiguraFSIUC.do?idFigura=230207907
Bromeliaceae	Tillandsia araujei	Mez	Native	EN	Herb	F, C	VI	de Paula, L.F.A. 863 (RB)	http://jabot.jbrj.gov.br/v3/consulta.php?edtcodbarras=1115673&chkboxherbario[]=RB
Bromeliaceae	Tillandsia brachyphylla	Baker	Native	EN	Herb	F, EC	VI	Baez, C. 538 (RB)	http://jabot.jbrj.gov.br/v3/consulta.php?edtcodbarras=1119296&chkboxherbario[]=RB
Bromeliaceae	Tillandsia gardneri	Lindl.	Native	LC	Herb	F, C	VI, S	de Paula, L.F.A. 249 (BHCB)
Bromeliaceae	Tillandsia geminiflora	Brongn.	Native	LC	Herb	F, A	VI	Couto et al. 2017
Bromeliaceae	Tillandsia loliacea	Mart. ex Schult. & Schult.f.	Native	NA	Herb	EC	VI	Barbosa-Silva, R.G. 498 (RB)	http://jabot.jbrj.gov.br/v3/consulta.php?edtcodbarras=1157407&chkboxherbario[]=RB
Bromeliaceae	Tillandsia mallemontii	Glaz. ex Mez	Native	LC	Herb	A	VI	Meirelles et al. 1999
Bromeliaceae	Tillandsia nuptialis	R.Braga & Sucre	Native	NA	Herb	F, EC	VI	Braga, P.I.S. 1556 (RB)	http://jabot.jbrj.gov.br/v3/consulta.php?edtcodbarras=174922&chkboxherbario[]=RB
Bromeliaceae	Tillandsia recurvata	(L.) L.	Native	NA	Herb	C	VI, S	de Paula, L.F.A. 375 (RB)	http://jabot.jbrj.gov.br/v3/consulta.php?edtcodbarras=818827&chkboxherbario[]=RB
Bromeliaceae	Tillandsia stricta	Sol.	Native	NA	Herb	F, C	VI, S	Azevedo, L.O. 446 (RB)	http://jabot.jbrj.gov.br/v3/consulta.php?edtcodbarras=1115735&chkboxherbario[]=RB
Bromeliaceae	Tillandsia sucrei	E.Pereira	Native	CR	Herb	F, EC	VI	Sucre, D. 1715 (RB)	http://jabot.jbrj.gov.br/v3/consulta.php?edtcodbarras=287243&chkboxherbario[]=RB
Bromeliaceae	Tillandsia tenuifolia	L.	Native	LC	Herb	F, A	VI	Pena and Alves-Araújo 2017
Bromeliaceae	Tillandsia tricholepis	Baker	Native	LC	Herb	A	VI	Meirelles et al. 1999
Bromeliaceae	Tillandsia usneoides	(L.) L.	Native	LC	Herb	C	VI, S	de Paula, L.F.A. 958 (RB)	http://jabot.jbrj.gov.br/v3/consulta.php?edtcodbarras=1115422&chkboxherbario[]=RB
Bromeliaceae	Vriesea botafogensis	Mez	Native	CR	Herb	F, C	VI, S	Cardoso, L.J.T. 139 (RB)	http://jabot.jbrj.gov.br/v3/consulta.php?edtcodbarras=417018&chkboxherbario[]=RB
Bromeliaceae	Vriesea fontanae	Fraga & Leme	Native	NA	Herb	F, C	VI	Fraga, C.N. 1164 (RB)	http://jabot.jbrj.gov.br/v3/consulta.php?edtcodbarras=595334&chkboxherbario[]=RB
Bromeliaceae	Vriesea neoglutinosa	Mez	Native	LC	Herb	F, C	VI	Couto, D.R. 1212 (VIES)	http://floradobrasil.jbrj.gov.br/reflora/geral/ExibeFiguraFSIUC/ExibeFiguraFSIUC.do?idFigura=122986323
Bromeliaceae	Vriesea procera	(Mart. ex Schult. & Schult.f.) Wittm.	Native	LC	Herb	C	VI, S	de Paula, L.F.A. 1161 (RB)	http://jabot.jbrj.gov.br/v3/consulta.php?edtcodbarras=1384857&chkboxherbario[]=RB
Bromeliaceae	Vriesea saundersii	(Carrière) E.Morren ex Mez	Native	DD	Herb	F, EC	VI, S	Baez, C. 314 (RB)	http://jabot.jbrj.gov.br/v3/consulta.php?edtcodbarras=1194355&chkboxherbario[]=RB
Bromeliaceae	Vriesea vellozicola	Leme & J.A.Siqueira	Native	NA	Herb	F, C	VI	Forzza, R.C. 7601 (RB)	http://jabot.jbrj.gov.br/v3/consulta.php?edtcodbarras=RB00810115&chkboxherbario[]=RB
Burmanniaceae	Burmannia capitata	(Walter ex J.F.Gmel.) Mart.	Native	NA	Herb	F, C	VI, S	Fraga, C.N. 2493 (RB)	http://jabot.jbrj.gov.br/v3/consulta.php?edtcodbarras=557933&chkboxherbario[]=RB
Cactaceae	Cereus hildmannianus	K.Schum.	Native	NA	Shrub	F, A	VI	Pena and Alves-Araújo 2017
Cactaceae	Cereus fernambucensis	Lem.	Native	NA	Shrub	F, C	VI	de Paula, L.F.A. 1047 (RB)	http://jabot.jbrj.gov.br/v3/consulta.php?edtcodbarras=1157446&chkboxherbario[]=RB
Cactaceae	Coleocephalocereus braunii	Diers & Esteves	Native	NA	Shrub; Subshrub	F, EC	VI	Esteves, E. 172 (UFG)
Cactaceae	Coleocephalocereus buxbaumianus	Buining	Native	NA	Shrub	F, C	VI	Mauad, L.P. 373 (RB)	http://jabot.jbrj.gov.br/v3/consulta.php?edtcodbarras=1115621&chkboxherbario[]=RB
Cactaceae	Coleocephalocereus decumbens	Ritter	Native	NA	Shrub; Subshrub	F, C	VI	de Paula, L.F.A. 906 (RB)	http://jabot.jbrj.gov.br/v3/consulta.php?edtcodbarras=1115716&chkboxherbario[]=RB
Cactaceae	Coleocephalocereus fluminensis	(Miq.) Backeb.	Native	NA	Shrub	F, C	VI	de Paula, L.F.A. 1037 (RB)	http://jabot.jbrj.gov.br/v3/consulta.php?edtcodbarras=1157436&chkboxherbario[]=RB
Cactaceae	Coleocephalocereus pluricostatus	Buining & Brederoo	Native	NA	Shrub; Subshrub	F, C	VI	de Paula, L.F.A. 990 (RB)	http://jabot.jbrj.gov.br/v3/consulta.php?edtcodbarras=1115458&chkboxherbario[]=RB
Cactaceae	Hatiora cylindrica	Britton & Rose	Native	DD	Herb	EC	VI, S	Zorzanelli, J.P.F. 1087 (RB)	http://jabot.jbrj.gov.br/v3/consulta.php?edtcodbarras=RB01097481&chkboxherbario[]=RB
Cactaceae	Hylocereus setaceus	(Salm-Dyck) R.Bauer	Native	LC	Liana/Vine	F, C	VI	de Paula, L.F.A. 908 (RB)	http://jabot.jbrj.gov.br/v3/consulta.php?edtcodbarras=1115718&chkboxherbario[]=RB
Cactaceae	Lepismium cruciforme	(Vell.) Miq.	Native	LC	Herb	F, C	VI, S	Kollmann, L. 11388 (RB)	http://jabot.jbrj.gov.br/v3/consulta.php?edtcodbarras=557382&chkboxherbario[]=RB
Cactaceae	Pereskia aculeata	Mill.	Native	LC	Liana/Vine	F, C	VI, S	de Paula. L.F.A. 1067 (RB)	http://jabot.jbrj.gov.br/v3/consulta.php?edtcodbarras=1157466&chkboxherbario[]=RB
Cactaceae	Pilosocereus arrabidae	(Lem.) Byles & Rowley	Native	LC	Shrub	F, EC	VI	Barros, A.A.M. 2300 (RB)	http://jabot.jbrj.gov.br/v3/consulta.php?edtcodbarras=RB00534956&chkboxherbario[]=RB
Cactaceae	Pilosocereus brasiliensis	(Britton & Rose) Backeb.	Native	NT	Shrub; Liana/Vine	F, C	VI	de Paula, L.F.A. 1075 (RB)	http://jabot.jbrj.gov.br/v3/consulta.php?edtcodbarras=1115485&chkboxherbario[]=RB
Cactaceae	Rhipsalis floccosa	Salm-Dyck ex Pfeiff.	Native	LC	Herb; Subshrub	A	VI	Pena and Alves-Araújo 2017
Cactaceae	Rhipsalis cereoides	(Backeb. & Voll) Backeb.	Native	CR	Herb	F, A	VI	Meirelles et al. 1999
Cactaceae	Rhipsalis grandiflora	Haw.	Native	NA	Subshrub	EC	VI, S	Carauta, J.P.P. 3353 (RB)	http://jabot.jbrj.gov.br/v3/consulta.php?edtcodbarras=64703&chkboxherbario[]=RB
Cactaceae	Rhipsalis triangularis	Werderm.	Native	NA	Subshrub	C	VI	Braga, J.M.A. 3357 (RB)	http://jabot.jbrj.gov.br/v3/consulta.php?edtcodbarras=RB00685288&chkboxherbario[]=RB
Calophyllaceae	Kielmeyera coriacea	Mart. & Zucc.	Native	NA	Tree	A	VI, S	Pena and Alves-Araújo 2017
Calophyllaceae	Kielmeyera membranacea	Casar.	Native	NA	Tree	A	VI	Meirelles et al. 1999
Calophyllaceae	Kielmeyera rupestris	Duarte	Native	CR	Tree	F, C	VI, S	de Paula, L.F.A. 895 (RB)	http://jabot.jbrj.gov.br/v3/consulta.php?edtcodbarras=1115705&chkboxherbario[]=RB
Campanulaceae	Lobelia thapsoidea	Schott	Native	NA	Herb	F, A	VI	Couto et al. 2017
Cannaceae	Canna indica	L.	Native	NA	Herb	A	VI	Couto et al. 2017
Clusiaceae	Clusia criuva	Cambess.	Native	LC	Shrub	C	VI	Mauad, L.P. 238 (RB)	http://jabot.jbrj.gov.br/v3/consulta.php?edtcodbarras=761564&chkboxherbario[]=RB
Clusiaceae	Clusia fluminensis	Planch. & Triana	Native	NA	Tree	A	VI	Meirelles et al. 1999
Clusiaceae	Clusia spiritu-sanctensis	G.Mariz & B.Weinberg	Native	NA	Shrub; Tree	A	VI	Pena and Alves-Araújo 2017
Commelinaceae	Commelina benghalensis	L.	Naturalized	NA	Herb	F, C	VI	Mauad, L.P. 20 (RB)	http://jabot.jbrj.gov.br/v3/consulta.php?edtcodbarras=719807&chkboxherbario[]=RB
Commelinaceae	Commelina erecta	L.	Native	NA	Herb	F, C	VI	Mauad, L.P. 413 (RB)	http://jabot.jbrj.gov.br/v3/consulta.php?edtcodbarras=1140112&chkboxherbario[]=RB
Convolvulaceae	Evolvulus ericifolius	Mart. ex Schrank	Native	LC	Herb	C	VI	Azevedo, L.O. 439 (RB)	http://jabot.jbrj.gov.br/v3/consulta.php?edtcodbarras=1115728&chkboxherbario[]=RB
Convolvulaceae	Evolvulus glomeratus	Nees & Mart.	Native	NA	Herb; Subshrub	A	VI	Meirelles et al. 1999
Convolvulaceae	Ipomoea bahiensis	Willd. ex Roem. & Schult.	Native	NA	Liana/Vine	A	VI, S	Pena and Alves-Araújo 2017
Convolvulaceae	Ipomoea grandifolia	(Dammer) O'Donell	Native	NA	Liana/Vine	C	VI	Fraga, C.N. 2542 (RB)	http://jabot.jbrj.gov.br/v3/consulta.php?edtcodbarras=RB00557982&chkboxherbario[]=RB
Convolvulaceae	Jacquemontia glaucescens	Choisy	Native	NA	Liana/Vine	C	VI	Forzza, R.C. 7558 (RB)	http://jabot.jbrj.gov.br/v3/consulta.php?edtcodbarras=810070&chkboxherbario[]=RB
Convolvulaceae	Jacquemontia holosericea	(Weinm.) O'Donell	Native	NA	Liana/Vine	C	VI, S	Azevedo, L.O. 486 (RB)	http://jabot.jbrj.gov.br/v3/consulta.php?edtcodbarras=1115776&chkboxherbario[]=RB
Convolvulaceae	Jacquemontia martii	Choisy	Native	NA	Liana/Vine	A	VI	Pena and Alves-Araújo 2017
Crassulaceae	Kalanchoe crenata	(Andrews) Haw.	Naturalized	NA	Herb	A	VI	Meirelles et al. 1999
Crassulaceae	Kalanchoe delagoensis	Eckl. & Zeyh.	Naturalized	NA	Herb	EC	VI	Barbosa-Silva, R.G. 525 (RB)	http://jabot.jbrj.gov.br/v3/consulta.php?edtcodbarras=1157433&chkboxherbario[]=RB
Cyperaceae	Bulbostylis scabra	(J.Presl & C.Presl) C.B.Clarke	Native	NA	Herb	A	VI	Pena and Alves-Araújo 2017
Cyperaceae	Bulbostylis capillaris	(L.) C.B.Clarke	Native	NA	Herb	F, C	VI	Mauad, L.P. 429 (RB)	http://jabot.jbrj.gov.br/v3/consulta.php?edtcodbarras=1140128&chkboxherbario[]=RB
Cyperaceae	Bulbostylis hirtella	(Schrad.) Urb.	Native	NA	Herb	C	VI	Azevedo, L.O. 400 (RB)	http://jabot.jbrj.gov.br/v3/consulta.php?edtcodbarras=1115642&chkboxherbario[]=RB
Cyperaceae	Bulbostylis lagoensis	(Boeckeler) Prata & M.G.López	Native	NA	Herb	C	VI	de Paula, L.F.A. 1154 (RB)	http://jabot.jbrj.gov.br/v3/consulta.php?edtcodbarras=1384868&chkboxherbario[]=RB
Cyperaceae	Bulbostylis truncata	(Nees) M.T.Strong	Native	NA	Herb	F, C	VI	Kollmann, L. 10687 (RB)	http://jabot.jbrj.gov.br/v3/consulta.php?edtcodbarras=RB00522062&chkboxherbario[]=RB
Cyperaceae	Cyperus coriifolius	Boeckeler	Native	NA	Herb	F, C	VI	de Paula, L.F.A. 929 (RB)	http://jabot.jbrj.gov.br/v3/consulta.php?edtcodbarras=RB01115389&chkboxherbario[]=RB
Cyperaceae	Cyperus hermaphroditus	(Jacq.) Standl.	Native	NA	Herb	A	VI	Pena and Alves-Araújo 2017
Cyperaceae	Cyperus luzulae	(L.) Retz.	Native	NA	Herb	EC	VI	Fontana, A.P. 5806 (RB)	http://jabot.jbrj.gov.br/v3/consulta.php?edtcodbarras=RB00557315&chkboxherbario[]=RB
Cyperaceae	Cyperus pohlii	(Nees) Steud.	Native	NA	Herb	C	VI	de Paula, L.F.A. 1061 (RB)	http://jabot.jbrj.gov.br/v3/consulta.php?edtcodbarras=RB01157460&chkboxherbario[]=RB
Cyperaceae	Cyperus uncinulatus	Schrad. ex Nees	Native	NA	Herb	C	VI	de Paula, L.F.A. 981 (RB)	http://jabot.jbrj.gov.br/v3/consulta.php?edtcodbarras=RB01115449&chkboxherbario[]=RB
Cyperaceae	Fuirena umbellata	Rottb.	Native	NA	Herb	C	VI	de Paula, L.F.A. 806 (RB)	http://jabot.jbrj.gov.br/v3/consulta.php?edtcodbarras=1142557&chkboxherbario[]=RB
Cyperaceae	Rhynchospora riparia	(Nees) Boeckeler	Native	NA	Herb	A	VI	Pena and Alves-Araújo 2017
Cyperaceae	Rhynchospora rugosa	(Vahl) Gale	Native	NA	Herb	C	VI	de Paula, L.F.A. 874 (RB)	http://jabot.jbrj.gov.br/v3/consulta.php?edtcodbarras=RB01115684&chkboxherbario[]=RB
Cyperaceae	Rhynchospora tenuis	Link	Native	NA	Herb	F, C	VI	de Paula, L.F.A. 807 (RB)	http://jabot.jbrj.gov.br/v3/consulta.php?edtcodbarras=1142558&chkboxherbario[]=RB
Cyperaceae	Scleria hirtella	Sw.	Native	NA	Herb	A	VI	Pena and Alves-Araújo 2017
Cyperaceae	Scleria latifolia	Sw.	Native	NA	Herb	A	VI	Pena and Alves-Araújo 2017
Cyperaceae	Trilepis ciliatifolia	T.Koyama	Native	NA	Herb	F, EC	VI	Braga, J.M.A. 696 (RB)	http://jabot.jbrj.gov.br/v3/consulta.php?edtcodbarras=RB00738397&chkboxherbario[]=RB
Cyperaceae	Trilepis lhotzkiana	Nees ex Arn.	Native	NA	Herb	F, C	VI	de Paula, L.F.A. 883 (RB)	http://jabot.jbrj.gov.br/v3/consulta.php?edtcodbarras=RB01115693&chkboxherbario[]=RB
Cyperaceae	Trilepis microstachya	(C.B.Clarke) H.Pfeiff.	Native	NA	Herb	C	VI	de Paula, L.F.A. 1042 (RB)	http://jabot.jbrj.gov.br/v3/consulta.php?edtcodbarras=RB01157441&chkboxherbario[]=RB
Dilleniaceae	Davilla hirsuticarpa	Fraga & Aymard	Native	NA	Liana/Vine	C	VI, S	Fraga, C.N. 3795 (RB)	http://jabot.jbrj.gov.br/v3/consulta.php?edtcodbarras=1420273&chkboxherbario[]=RB
Dioscoreaceae	Dioscorea basiclavicaulis	Rizzini & A.Mattos	Native	NA	Liana/Vine	C	VI, S	Fraga, F.R.M. 166 (RB)	http://jabot.jbrj.gov.br/v3/consulta.php?edtcodbarras=1388047&chkboxherbario[]=RB
Dioscoreaceae	Dioscorea cinnamomifolia	Hook.	Native	NA	Liana/Vine	F, EC	VI, S	de Paula, C.H.R. 197 (RB)	http://jabot.jbrj.gov.br/v3/consulta.php?edtcodbarras=RB00681945&chkboxherbario[]=RB
Dioscoreaceae	Dioscorea glandulosa	(Griseb.) Kunth	Native	NA	Liana/Vine	C	VI	Mauad, L.P. 459 (RB)	http://jabot.jbrj.gov.br/v3/consulta.php?edtcodbarras=1157479&chkboxherbario[]=RB
Dioscoreaceae	Dioscorea medusae	F.Fraga, R.Couto & J.M.A.Braga	Native	NA	Liana/Vine	EC	VI, S	Fraga, F.R.M. 131 (RB)	http://jabot.jbrj.gov.br/v3/consulta.php?edtcodbarras=1387948&chkboxherbario[]=RB
Dioscoreaceae	Dioscorea ovata	Vell.	Native	NA	Liana/Vine	C	VI	Forzza, R.C. 8761 (RB)	http://jabot.jbrj.gov.br/v3/consulta.php?edtcodbarras=1115526&chkboxherbario[]=RB
Dioscoreaceae	Dioscorea polygonoides	Humb. & Bonpl. ex Willd.	Native	NA	Liana/Vine	C	VI	de Paula, L.F.A. 337 (RB)	http://jabot.jbrj.gov.br/v3/consulta.php?edtcodbarras=802495&chkboxherbario[]=RB
Dioscoreaceae	Dioscorea sincorensis	R.Knuth	Native	NA	Liana/Vine	C	VI, S	de Paula, L.F.A. 918 (RB)	http://jabot.jbrj.gov.br/v3/consulta.php?edtcodbarras=1115376&chkboxherbario[]=RB
Erythroxylaceae	Erythroxylum affine	A.St.-Hil.	Native	NA	Shrub; Tree	A	VI, S	Pena and Alves-Araújo 2017
Erythroxylaceae	Erythroxylum nummularium	Peyr.	Native	NA	Shrub; Tree	C	VI, S	de Paula, L.F.A. 1177 (RB)	http://jabot.jbrj.gov.br/v3/consulta.php?edtcodbarras=1384872&chkboxherbario[]=RB
Erythroxylaceae	Erythroxylum passerinum	Mart.	Native	LC	Shrub; Tree	A	VI	Pena and Alves-Araújo 2017
Erythroxylaceae	Erythroxylum pulchrum	A.St.-Hil.	Native	LC	Shrub; Tree	F, EC	VI, S	Braga, J.M.A. 3553 (RB)	http://jabot.jbrj.gov.br/v3/consulta.php?edtcodbarras=79206&chkboxherbario[]=RB
Erythroxylaceae	Erythroxylum subrotundum	A.St.-Hil.	Native	NA	Shrub; Tree	F, A	VI, S	Pena and Alves-Araújo 2017
Euphorbiaceae	Astraea lobata	(L.) Klotzsch	Native	LC	Herb	A	VI	Pena and Alves-Araújo 2017
Euphorbiaceae	Cnidoscolus hamosus	Pohl	Native	NA	Shrub; Tree	F, C	VI	Azevedo, L.O. 420 (RB)	http://jabot.jbrj.gov.br/v3/consulta.php?edtcodbarras=1115662&chkboxherbario[]=RB
Euphorbiaceae	Cnidoscolus lombardii	Fern.Casas	Native	NA	Shrub	C	VI	de Paula, L.F.A. 1088 (RB)	http://jabot.jbrj.gov.br/v3/consulta.php?edtcodbarras=1115500&chkboxherbario[]=RB
Euphorbiaceae	Cnidoscolus urens	(L.) Arthur	Native	NA	Shrub; Subshrub	F, C	VI	Azevedo, L.O. 465 (RB)	http://jabot.jbrj.gov.br/v3/consulta.php?edtcodbarras=1115755&chkboxherbario[]=RB
Euphorbiaceae	Cnidoscolus urentissimus	Fern.Casas	Native	NA	Shrub	F, A	VI, S	Pena and Alves-Araújo 2017
Euphorbiaceae	Croton compressus	Lam.	Native	LC	Shrub	A	VI, S	Meirelles et al. 1999
Euphorbiaceae	Croton lundianus	(Didr.) Müll.Arg.	Native	NA	Herb; Subshrub	C	VI, S	Azevedo, L.O. 466 (RB)	http://jabot.jbrj.gov.br/v3/consulta.php?edtcodbarras=RB01115756&chkboxherbario[]=RB
Euphorbiaceae	Croton nepetifolius	Baill.	Native	NA	Shrub	C	VI, S	de Paula, L.F.A. 1019 (RB)	http://jabot.jbrj.gov.br/v3/consulta.php?edtcodbarras=1142584&chkboxherbario[]=RB
Euphorbiaceae	Croton urticifolius	Lam.	Native	NA	Shrub; Subshrub	C	VI	Azevedo, L.O. 482 (RB)	http://jabot.jbrj.gov.br/v3/consulta.php?edtcodbarras=1115772&chkboxherbario[]=RB
Euphorbiaceae	Dalechampia brasiliensis	Lam.	Native	NA	Liana/Vine	C	VI, S	Forzza, R.C. 5098 (RB)	http://jabot.jbrj.gov.br/v3/consulta.php?edtcodbarras=540898&chkboxherbario[]=RB
Euphorbiaceae	Euphorbia comosa	Vell.	Native	NA	Tree	C	VI	de Paula, L.F.A. 1064 (RB)	http://jabot.jbrj.gov.br/v3/consulta.php?edtcodbarras=1157463&chkboxherbario[]=RB
Euphorbiaceae	Euphorbia holochlorina	Rizzini	Native	CR	Shrub	F, C	VI	de Paula, L.F.A. 980 (RB)	http://jabot.jbrj.gov.br/v3/consulta.php?edtcodbarras=1115447&chkboxherbario[]=RB
Euphorbiaceae	Manihot leptopoda	(Müll.Arg.) D.J.Rogers & Appan	Native	NA	Shrub	A	VI	Meirelles et al. 1999
Euphorbiaceae	Manihot tripartita	(Spreng.) Müll.Arg.	Native	NA	Shrub	C	VI	Mauad, L.P. 201 (RB)	http://jabot.jbrj.gov.br/v3/consulta.php?edtcodbarras=761567&chkboxherbario[]=RB
Euphorbiaceae	Romanoa tamnoides	(A.Juss.) Radcl.-Sm.	Native	NA	Liana/Vine	C	VI	Mauad, L.P. 438 (RB)	http://jabot.jbrj.gov.br/v3/consulta.php?edtcodbarras=1140137&chkboxherbario[]=RB
Euphorbiaceae	Stillingia argutedentata	Jabl.	Native	NA	Shrub	C	VI	de Paula, L.F.A. 1084 (RB)	http://jabot.jbrj.gov.br/v3/consulta.php?edtcodbarras=RB01115494&chkboxherbario[]=RB
Euphorbiaceae	Stillingia dichotoma	Müll.Arg.	Native	NA	Shrub	F, C	VI	Azevedo, L.O. 429 (RB)	http://jabot.jbrj.gov.br/v3/consulta.php?edtcodbarras=1115671&chkboxherbario[]=RB
Fabaceae	Aeschynomene americana	L.	Native	NA	Herb; Subshrub	C	VI	Forzza, R.C. 5742 (RB)	http://jabot.jbrj.gov.br/v3/consulta.php?edtcodbarras=591065&chkboxherbario[]=RB
Fabaceae	Aeschynomene elegans	Schltdl. & Cham.	Native	NA	Herb; Subshrub	C	VI	Mauad, L.P. 218 (RB)	http://jabot.jbrj.gov.br/v3/consulta.php?edtcodbarras=770180&chkboxherbario[]=RB
Fabaceae	Centrosema coriaceum	Benth.	Native	NA	Liana/Vine; Subshrub	EC	VI	Barbosa-Silva, R.G. 516 (RB)	http://jabot.jbrj.gov.br/v3/consulta.php?edtcodbarras=1157425&chkboxherbario[]=RB
Fabaceae	Chamaecrista glandulosa	(L.) Greene	Native	NA	Shrub; Subshrub	A	VI	Santos et al. 2010
Fabaceae	Chamaecrista nictitans	(L.) Moench	Native	NA	Shrub; Subshrub	A	VI	Meirelles et al. 1999
Fabaceae	Chamaecrista rotundifolia	(Pers.) Greene	Native	NA	Shrub; Herb; Subshrub	C	VI, S	Forzza, R.C. 5540 (RB)	http://jabot.jbrj.gov.br/v3/consulta.php?edtcodbarras=558052&chkboxherbario[]=RB
Fabaceae	Chamaecrista zygophylloides	(Taub.) H.S.Irwin & Barneby	Native	NA	Shrub; Subshrub	EC	VI	Dan, M.L. 64 (RB)
Fabaceae	Dalbergia frutescens	(Vell.) Britton	Native	NA	Shrub; Liana/Vine	EC	VI, S	Braga, J.M.A. 3518 (RB)	http://jabot.jbrj.gov.br/v3/consulta.php?edtcodbarras=114570&chkboxherbario[]=RB
Fabaceae	Machaerium hirtum	(Vell.) Stellfeld	Native	NA	Tree	EC	VI, S	Barros, A.M.M. 2699 (RB)	http://jabot.jbrj.gov.br/v3/consulta.php?edtcodbarras=586025&chkboxherbario[]=RB
Fabaceae	Mimosa velloziana	Mart.	Native	NA	Shrub; Subshrub	EC	VI, S	Silva, R.C.C. 2 (RB)	http://jabot.jbrj.gov.br/v3/consulta.php?edtcodbarras=115500&chkboxherbario[]=RB
Fabaceae	Senna cana	(Nees & Mart.) H.S.Irwin & Barneby	Native	NA	Shrub; Tree	F, C	VI, S	Fraga, C.N. 3776 (RB)	http://jabot.jbrj.gov.br/v3/consulta.php?edtcodbarras=1420254&chkboxherbario[]=RB
Fabaceae	Senna oblongifolia	(Vogel) H.S.Irwin & Barneby	Native	NA	Shrub	A	VI, S	Pena and Alves-Araújo 2017
Fabaceae	Senna spinigera	(Rizzini) H.S.Irwin & Barneby	Native	NA	Subshrub	F, EC	VI, S	Lima, H.C. 7628 (RB)	http://jabot.jbrj.gov.br/v3/consulta.php?edtcodbarras=827005&chkboxherbario[]=RB
Fabaceae	Stylosanthes guianensis	(Aubl.) Sw.	Native	NA	Subshrub	C	VI	de Paula, L.F.A. 1181 (RB)	http://jabot.jbrj.gov.br/v3/consulta.php?edtcodbarras=1384878&chkboxherbario[]=RB
Fabaceae	Stylosanthes viscosa	(L.) Sw.	Native	NA	Subshrub	A	VI, S	Pena and Alves-Araújo 2017
Gentianaceae	Chelonanthus purpurascens	(Aubl.) Struwe et al.	Native	NA	Herb; Subshrub	C	VI	Fraga, C.N. 3797 (RB)	http://jabot.jbrj.gov.br/v3/consulta.php?edtcodbarras=RB01420275&chkboxherbario[]=RB
Gentianaceae	Prepusa dibotrya	Fraga, A.P. Fontana & L. Kollmann	Native	NA	Herb	C	VI	Kollmann, L. 12598 (RB)	http://jabot.jbrj.gov.br/v3/consulta.php?edtcodbarras=842949&chkboxherbario[]=RB
Gesneriaceae	Paliavana prasinata	(Ker Gawl.) Benth.	Native	NA	Shrub	C	VI, S	de Paula, L.F.A. 1157 (RB)	http://jabot.jbrj.gov.br/v3/consulta.php?edtcodbarras=1384844&chkboxherbario[]=RB
Gesneriaceae	Paliavana tenuiflora	Mansf.	Native	NA	Shrub	F, EC	VI	Amorim, A. 6931 (RB)	http://jabot.jbrj.gov.br/v3/consulta.php?edtcodbarras=RB00519681&chkboxherbario[]=RB
Gesneriaceae	Sinningia aghensis	Chautems	Native	EN	Herb	F, C	VI	Forzza, R.C. 5733 (RB)	http://jabot.jbrj.gov.br/v3/consulta.php?edtcodbarras=591056&chkboxherbario[]=RB
Gesneriaceae	Sinningia bragae	Chautems, M.Peixoto & Rossini	Native	NA	Herb	C	VI	Mauad, L.P. 415 (RB)	http://jabot.jbrj.gov.br/v3/consulta.php?edtcodbarras=1140114&chkboxherbario[]=RB
Gesneriaceae	Sinningia brasiliensis	(Regel & Schmidt) Wiehler & Chautems	Native	LC	Herb	C	VI, S	Fraga, C.N. 1910 (RB)	http://jabot.jbrj.gov.br/v3/consulta.php?edtcodbarras=RB00521505&chkboxherbario[]=RB
Gesneriaceae	Sinningia bulbosa	(Ker Gawl.) Wiehler	Native	NA	Herb	C	VI	de Paula, L.F.A. 864 (RB)	http://jabot.jbrj.gov.br/v3/consulta.php?edtcodbarras=RB01115674&chkboxherbario[]=RB
Gesneriaceae	Sinningia magnifica	(Otto & A.Dietr.) Wiehler	Native	LC	Herb	F, A	VI	Couto et al. 2017
Gesneriaceae	Vanhouttea calcarata	Lem.	Native	LC	Shrub	A	VI	Couto et al. 2017
Lamiaceae	Vitex polygama	Cham.	Native	NA	Shrub; Tree	EC	VI, S	Andreata, R. 331 (RB)	http://jabot.jbrj.gov.br/v3/consulta.php?edtcodbarras=RB00683800&chkboxherbario[]=RB
Lentibulariaceae	Genlisea lobata	Fromm	Native	EN	Herb	F, EC	VI	Kollmann, L. 5446 (MBML)	http://floradobrasil.jbrj.gov.br/reflora/geral/ExibeFiguraFSIUC/ExibeFiguraFSIUC.do?idFigura=230242845
Lentibulariaceae	Utricularia nelumbifolia	Gardner	Native	NA	Herb	A	VI	Couto et al. 2017
Lentibulariaceae	Utricularia subulata	L.	Native	NA	Herb	C	VI	de Paula, L.F.A. 162 (BHCB)
Loasaceae	Aosa parviflora	(Schrad. ex DC.) Weigend	Native	LC	Herb	C	VI, S	de Paula, L.F.A. 938 (RB)	http://jabot.jbrj.gov.br/v3/consulta.php?edtcodbarras=1115400&chkboxherbario[]=RB
Lythraceae	Cuphea carthagenensis	(Jacq.) J.F.Macbr.	Native	NA	Herb; Subshrub	A	VI	Couto et al. 2017
Lythraceae	Cuphea flava	Spreng.	Native	NA	Subshrub	C	VI	Mauad, L.P. 354 (RB)	http://jabot.jbrj.gov.br/v3/consulta.php?edtcodbarras=RB01115602&chkboxherbario[]=RB
Lythraceae	Cuphea sessilifolia	Mart.	Native	NA	Subshrub	C	VI	de Paula, L.F.A. 360 (RB)	http://jabot.jbrj.gov.br/v3/consulta.php?edtcodbarras=RB00816027&chkboxherbario[]=RB
Malpighiaceae	Amorimia maritima	(A.Juss.) W.R.Anderson	Native	NA	Liana/Vine	F, EC	VI, S	Amorim, A. 7529 (RB)	http://jabot.jbrj.gov.br/v3/consulta.php?edtcodbarras=RB00532038&chkboxherbario[]=RB
Malpighiaceae	Banisteriopsis adenopoda	(A.Juss.) B.Gates	Native	NA	Liana/Vine	C	VI	Forzza, R.C. 5806 (RB)	http://jabot.jbrj.gov.br/v3/consulta.php?edtcodbarras=591238&chkboxherbario[]=RB
Malpighiaceae	Heteropterys chrysophylla	(Lam.) DC.	Native	NA	Liana/Vine	C	VI, S	Mauad, L.P. 300 (RB)	http://jabot.jbrj.gov.br/v3/consulta.php?edtcodbarras=945744&chkboxherbario[]=RB
Malpighiaceae	Stigmaphyllon acuminatum	A.Juss.	Native	NA	Liana/Vine	C	VI	Mauad, L.P. 220 (RB)	http://jabot.jbrj.gov.br/v3/consulta.php?edtcodbarras=945737&chkboxherbario[]=RB
Malpighiaceae	Stigmaphyllon alternifolium	A.Juss.	Native	NA	Liana/Vine	F, EC	VI	Carauta, J.P.P. 2372 (RB)	http://jabot.jbrj.gov.br/v3/consulta.php?edtcodbarras=214545&chkboxherbario[]=RB
Malpighiaceae	Stigmaphyllon crenatum	C.E.Anderson	Native	EN	Shrub; Liana/Vine; Subshrub	F, C	VI	Azevedo, L.O. 401 (RB)	http://jabot.jbrj.gov.br/v3/consulta.php?edtcodbarras=RB01115643&chkboxherbario[]=RB
Malpighiaceae	Stigmaphyllon paralias	A.Juss.	Native	NA	Shrub	C	VI, S	Azevedo, L.O. 406 (RB)	http://jabot.jbrj.gov.br/v3/consulta.php?edtcodbarras=1115648&chkboxherbario[]=RB
Malvaceae	Ceiba erianthos	(Cav.) K.Schum.	Native	NA	Tree	F, EC	VI, S	Barbosa-Silva, R.G. 515 (RB)	http://jabot.jbrj.gov.br/v3/consulta.php?edtcodbarras=1157424&chkboxherbario[]=RB
Malvaceae	Pseudobombax grandiflorum	(Cav.) A.Robyns	Native	LC	Tree	EC	VI, S	Andreata, R. 958 (RB)	http://jabot.jbrj.gov.br/v3/consulta.php?edtcodbarras=571439&chkboxherbario[]=RB
Malvaceae	Pseudobombax majus	(A.Robyns) Carv.-Sobr.	Native	NA	Tree	C	VI, S	Forzza, R.C. 5189 (RB)	http://jabot.jbrj.gov.br/v3/consulta.php?edtcodbarras=542919&chkboxherbario[]=RB
Malvaceae	Pseudobombax petropolitanum	A.Robyns	Native	NA	Shrub; Tree	F, EC	VI, S	Forzza, R.C. 5168 (RB)	http://jabot.jbrj.gov.br/v3/consulta.php?edtcodbarras=542898&chkboxherbario[]=RB
Malvaceae	Sida cordifolia	L.	Native	NA	Herb; Subshrub	C	VI	Mauad, L.P. 439 (RB)	http://jabot.jbrj.gov.br/v3/consulta.php?edtcodbarras=1140138&chkboxherbario[]=RB
Malvaceae	Sida linifolia	Cav.	Native	NA	Shrub; Herb; Subshrub	C	VI	Mauad, L.P. 397 (RB)	http://jabot.jbrj.gov.br/v3/consulta.php?edtcodbarras=1140097&chkboxherbario[]=RB
Malvaceae	Waltheria indica	L.	Native	NA	Herb; Subshrub	A	VI, S	Meirelles et al. 1999
Melastomataceae	Cambessedesia eichleri	Cogn.	Native	LC	Shrub; Herb; Subshrub	C	VI	de Paula, L.F.A. 363 (RB)	http://jabot.jbrj.gov.br/v3/consulta.php?edtcodbarras=RB00816085&chkboxherbario[]=RB
Melastomataceae	Clidemia hirta	(L.) D.Don	Native	NA	Shrub	A	VI	Pena and Alves-Araújo 2017
Melastomataceae	Dolichoura kollmannii	R.Goldenb. & R.Tav.	Native	NA	Shrub	C	VI	Kollmann, L. 7420 (RB)	http://jabot.jbrj.gov.br/v3/consulta.php?edtcodbarras=591392&chkboxherbario[]=RB
Melastomataceae	Merianthera bullata	R.Goldenb., Fraga & A.P.Fontana	Native	NA	Shrub	EC	VI	Fontana, A.P. 2839 (RB)	http://jabot.jbrj.gov.br/v3/consulta.php?edtcodbarras=RB00561829&chkboxherbario[]=RB
Melastomataceae	Merianthera burlemarxii	Wurdack	Native	EN	Shrub	F, C	VI	Forzza, R.C. 5747 (RB)	http://jabot.jbrj.gov.br/v3/consulta.php?edtcodbarras=591070&chkboxherbario[]=RB
Melastomataceae	Merianthera parvifolia	R.Goldenb., Fraga & A.P.Fontana	Native	NA	Shrub	EC	VI	Fontana, A.P. 5770 (RB)	http://jabot.jbrj.gov.br/v3/consulta.php?edtcodbarras=RB00557279&chkboxherbario[]=RB
Melastomataceae	Merianthera pulchra	Kuhlm.	Native	VU	Shrub; Tree	C	VI	Azevedo, L.O. 415 (RB)	http://jabot.jbrj.gov.br/v3/consulta.php?edtcodbarras=1115657&chkboxherbario[]=RB
Melastomataceae	Merianthera verrucosa	R.Goldenb., Fraga & A.P.Fontana	Native	NA	Tree	C	VI, S	Fraga, C.N. 3388 (RB)	http://jabot.jbrj.gov.br/v3/consulta.php?edtcodbarras=859317&chkboxherbario[]=RB
Melastomataceae	Miconia prasina	(Sw.) DC.	Native	NA	Shrub	C	VI	Kollmann, L. 11553 (MBML)	http://reflora.jbrj.gov.br/reflora/geral/ExibeFiguraFSIUC/ExibeFiguraFSIUC.do?idFigura=100524607
Melastomataceae	Pleroma costatocalyx	F.S.Mey., L. Kollmann & R. Goldenb.	Native	NA	Shrub	C	VI	Kollmann, L. 12977 (RB)	http://jabot.jbrj.gov.br/v3/consulta.php?edtcodbarras=1128101&chkboxherbario[]=RB
Melastomataceae	Pleroma cucullatum	F.S.Mey., Fraga & R.Goldenb.	Native	NA	Shrub	C	VI	de Paula, L.F.A. 945 (RB)	http://jabot.jbrj.gov.br/v3/consulta.php?edtcodbarras=1115408&chkboxherbario[]=RB
Melastomataceae	Pleroma fissinervium	Schrank et Mart. ex DC.	Native	NA	Tree	A	VI, S	Pena and Alves-Araújo 2017
Melastomataceae	Pleroma fontanae	F.S.Mey., L.Kollmann & R.Goldenb.	Native	NA	Shrub	C	VI	Fraga, C.N. 1163 (RB)	http://jabot.jbrj.gov.br/v3/consulta.php?edtcodbarras=550266&chkboxherbario[]=RB
Melastomataceae	Pleroma fragae	L.Kollmann e R.Goldenb.	Native	NA	Tree	C	VI, S	Kollmann, L. 10918 (RB)	http://jabot.jbrj.gov.br/v3/consulta.php?edtcodbarras=1043778&chkboxherbario[]=RB
Melastomataceae	Pleroma heteromallum	(D. Don) D.Don	Native	NA	Shrub	F, EC	VI	Belém, R.P. 1633 (RB)	http://jabot.jbrj.gov.br/v3/consulta.php?edtcodbarras=RB00241866&chkboxherbario[]=RB
Melastomataceae	Pleroma kollmannianum	F.S.Mey. & R.Goldenb.	Native	NA	Shrub	EC	VI	Meyer, F.S. 2219 (MBM)	http://reflora.jbrj.gov.br/reflora/geral/ExibeFiguraFSIUC/ExibeFiguraFSIUC.do?idFigura=229871843
Melastomataceae	Pleroma leopoldinense	L.Kollmann e R.Goldenb.	Native	NA	Subshrub	C	VI	Kollmann, L. 12684 (RB)	http://jabot.jbrj.gov.br/v3/consulta.php?edtcodbarras=1043811&chkboxherbario[]=RB
Melastomataceae	Pleroma marinanum	P.J.F.Guim. & Fraga	Native	NA	Shrub	F, C	VI	Azevedo, L.O. 416 (RB)	http://jabot.jbrj.gov.br/v3/consulta.php?edtcodbarras=RB01115658&chkboxherbario[]=RB
Melastomataceae	Pleroma penduliflorum	Fraga & P.J.F.Guim.	Native	NA	Shrub	F, C	VI	Kollmann, L. 10933 (RB)	http://jabot.jbrj.gov.br/v3/consulta.php?edtcodbarras=845942&chkboxherbario[]=RB
Melastomataceae	Pleroma subsessilis	F.S.Mey. & L.Kollmann	Native	NA	Shrub	EC	VI	Fontana, A.P. 6052 (MBML)	http://reflora.jbrj.gov.br/reflora/geral/ExibeFiguraFSIUC/ExibeFiguraFSIUC.do?idFigura=230209599
Melastomataceae	Pleroma venetiense	F.S.Mey., L.Kollmann & R.Goldenb.	Native	NA	Shrub	C	VI	Azevedo, L.O. 441 (RB)	http://jabot.jbrj.gov.br/v3/consulta.php?edtcodbarras=1115730&chkboxherbario[]=RB
Melastomataceae	Pleroma vimineum	(D.Don) D.Don	Native	NA	Shrub	F, A	VI	Meirelles et al. 1999
Melastomataceae	Tibouchina bahiensis	Wurdack	Native	NA	Shrub	EC	VI	Santos, T.S. 2716 (RB)	http://jabot.jbrj.gov.br/v3/consulta.php?edtcodbarras=RB00541545&chkboxherbario[]=RB
Melastomataceae	Tibouchina castellensis	Brade	Native	CR	Shrub	A	VI	Couto et al. 2017
Melastomataceae	Tibouchina radula	Markgr.	Native	NA	Shrub	F, A	VI	Pena and Alves-Araújo 2017
Microteaceae	Microtea glochidiata	Moq.	Native	NA	Subshrub	C	VI	Forzza, R.C. 7882 (RB)	http://jabot.jbrj.gov.br/v3/consulta.php?edtcodbarras=856330&chkboxherbario[]=RB
Molluginaceae	Mollugo verticillata	L.	Native	NA	Herb	C	VI	Mauad, L.P. 433 (RB)	http://jabot.jbrj.gov.br/v3/consulta.php?edtcodbarras=1140132&chkboxherbario[]=RB
Myrtaceae	Campomanesia eugenioides	(Cambess.) D.Legrand ex Landrum	Native	LC	Shrub; Tree	C	VI, S	Azevedo, L.O. 445 (RB)	http://jabot.jbrj.gov.br/v3/consulta.php?edtcodbarras=1115734&chkboxherbario[]=RB
Myrtaceae	Eugenia candolleana	DC.	Native	NA	Tree	A	VI	Couto et al. 2017
Myrtaceae	Eugenia sobraliana	Giaretta & Fraga	Native	NA	Tree	C	VI, S	Fraga, C.N. 2502 (RB)	http://jabot.jbrj.gov.br/v3/consulta.php?edtcodbarras=866021&chkboxherbario[]=RB
Myrtaceae	Eugenia uniflora	L.	Native	NA	Shrub	EC	VI, S	Braga, J.M.A. 5106 (RB)	http://jabot.jbrj.gov.br/v3/consulta.php?edtcodbarras=676035&chkboxherbario[]=RB
Myrtaceae	Myrcia cacuminis	L.Kollmann & Sobral	Native	NA	Shrub	F, EC	VI	Magnago, L.F.S. 1358 (RB)	http://jabot.jbrj.gov.br/v3/consulta.php?edtcodbarras=1099362&chkboxherbario[]=RB
Myrtaceae	Myrcia hartwegiana	(O.Berg) Kiaersk.	Native	NA	Tree	A	VI	Couto et al. 2017
Myrtaceae	Myrcia selloi	(Spreng.) N.Silveira	Native	NA	Shrub; Tree	C	VI, S	Azevedo, L.O. 391 (RB)	http://jabot.jbrj.gov.br/v3/consulta.php?edtcodbarras=1115632&chkboxherbario[]=RB
Myrtaceae	Myrciaria delicatula	(DC.) O.Berg	Native	NA	Tree	C	VI, S	Kollmann, L. 13161 (RB)	http://jabot.jbrj.gov.br/v3/consulta.php?edtcodbarras=1341224&chkboxherbario[]=RB
Oleaceae	Chionanthus fluminensis	(Miers) P.S.Green	Native	CR	Tree	C	VI, S	Mauad, L.P. 295 (RB)	http://jabot.jbrj.gov.br/v3/consulta.php?edtcodbarras=761578&chkboxherbario[]=RB
Orchidaceae	Acianthera limae	(Porto & Brade) Pridgeon & M.W.Chase	Native	NA	Herb	F, A	VI	Pena and Alves-Araújo 2017
Orchidaceae	Acianthera prolifera	(Herb. ex Lindl.) Pridgeon & M.W.Chase	Native	NA	Herb	F, C	VI	de Paula, L.F.A. 1140 (RB)	http://jabot.jbrj.gov.br/v3/consulta.php?edtcodbarras=1232790&chkboxherbario[]=RB
Orchidaceae	Bifrenaria harrisoniae	(Hook.) Rchb.f.	Native	LC	Herb	EC	VI	Saddi, E.M. 282 (RB)	http://jabot.jbrj.gov.br/v3/consulta.php?edtcodbarras=526455&chkboxherbario[]=RB
Orchidaceae	Bifrenaria tyrianthina	(Lodd. ex Loudon) Rchb.f.	Native	LC	Herb	F, A	VI	Couto et al. 2017
Orchidaceae	Brasiliorchis picta	(Hook.) R.B.Singer et al.	Native	NA	Herb	F, A	VI	Couto et al. 2017
Orchidaceae	Brassavola tuberculata	Hook.	Native	NA	Herb	F, A	VI	Meirelles et al. 1999
Orchidaceae	Bulbophyllum arianeae	Fraga & E.C.Smidt	Native	CR	Herb	C	VI	Fraga, C.N. 563 (MBML)	http://reflora.jbrj.gov.br/reflora/geral/ExibeFiguraFSIUC/ExibeFiguraFSIUC.do?idFigura=230208727
Orchidaceae	Bulbophyllum boudetianum	Fraga	Native	NA	Herb	C	VI	Fraga, C.N. 636 (MBML)
Orchidaceae	Bulbophyllum exaltatum	Lindl.	Native	LC	Herb	EC	VI	Gomes, J.M.L. 1145 (VIES)	http://reflora.jbrj.gov.br/reflora/geral/ExibeFiguraFSIUC/ExibeFiguraFSIUC.do?idFigura=100585347
Orchidaceae	Bulbophyllum weddellii	(Lindl.) Rchb.f.	Native	LC	Herb	EC	VI	Boudet Fernandes, H.Q. 1924 (MBML)
Orchidaceae	Cattleya cernua	(Lindl.) Van den Berg	Native	NA	Herb	EC	VI	Pessanha, A.S. 28 (HUENF)	http://jabot.jbrj.gov.br/v3/consulta.php?edtcodbarras=HUENF00005768&chkboxherbario[]=HUENF
Orchidaceae	Cattleya cinnabarina	(Bateman ex Lindl.) Van den Berg	Native	NA	Herb	F, A	VI	Couto et al. 2017
Orchidaceae	Cattleya coccinea	Lindl.	Native	NA	Herb	A	VI	Couto et al. 2017
Orchidaceae	Cattleya hoehnei	Van den Berg	Native	NA	Herb	A	VI	Pena and Alves-Araújo 2017
Orchidaceae	Cattleya lobata	Lindl.	Native	NA	Herb	C	VI	Fraga, C.N. 2835 (RB)	http://jabot.jbrj.gov.br/v3/consulta.php?edtcodbarras=RB00581130&chkboxherbario[]=RB
Orchidaceae	Christensonella pumila	(Hook.) Szlach. et al.	Native	LC	Herb	A	VI	Couto et al. 2017
Orchidaceae	Christensonella subulata	(Lindl.) Szlach. et al.	Native	NA	Herb	EC	VI	Saddi, E.M. 202 (RB)	http://jabot.jbrj.gov.br/v3/consulta.php?edtcodbarras=526451&chkboxherbario[]=RB
Orchidaceae	Cleistes libonii	(Rchb.f.) Schltr.	Native	LC	Herb	EC	VI, S	Saddi, E.M. 258 (RB)	http://jabot.jbrj.gov.br/v3/consulta.php?edtcodbarras=526458&chkboxherbario[]=RB
Orchidaceae	Cyrtopodium flavum	Link & Otto ex Rchb.f.	Native	LC	Herb	F, A	VI	Pena and Alves-Araújo 2017
Orchidaceae	Cyrtopodium glutiniferum	Raddi	Native	NA	Herb	F, C	VI	de Paula, L.F.A. 1017 (RB)	http://jabot.jbrj.gov.br/v3/consulta.php?edtcodbarras=1142582&chkboxherbario[]=RB
Orchidaceae	Elleanthus brasiliensis	(Lindl.) Rchb.f.	Native	NA	Herb	A	VI, S	Couto et al. 2017
Orchidaceae	Encyclia spiritusanctensis	L.C.Menezes	Native	NA	Herb	C	VI	de Paula, L.F.A. 917 (RB)	http://jabot.jbrj.gov.br/v3/consulta.php?edtcodbarras=1115375&chkboxherbario[]=RB
Orchidaceae	Epidendrum ammophilum	Barb.Rodr.	Native	NA	Herb	C	VI	Cardoso, L.J.T. 58 (RB)	http://jabot.jbrj.gov.br/v3/consulta.php?edtcodbarras=257103&chkboxherbario[]=RB
Orchidaceae	Epidendrum campaccii	Hágsater & L.Sánchez	Native	NA	Herb	A	VI	Pena and Alves-Araújo 2017
Orchidaceae	Epidendrum densiflorum	Hook.	Native	NA	Herb	A	VI, S	Couto et al. 2017
Orchidaceae	Epidendrum denticulatum	Barb.Rodr.	Native	NA	Herb	F, C	VI	Cardoso, L.J.T. 47 (RB)	http://jabot.jbrj.gov.br/v3/consulta.php?edtcodbarras=250568&chkboxherbario[]=RB
Orchidaceae	Epidendrum martianum	Lindl.	Native	LC	Herb	F, EC	VI	Magnago, L.F.S. 836 (MBML)
Orchidaceae	Epidendrum robustum	Cogn.	Native	VU	Herb	F, EC	VI	Fontana, A.P. 2340 (RB)	http://jabot.jbrj.gov.br/v3/consulta.php?edtcodbarras=RB00562159&chkboxherbario[]=RB
Orchidaceae	Epidendrum secundum	Jacq.	Native	LC	Herb	F, C	VI	de Paula, L.F.A. 1062 (RB)	http://jabot.jbrj.gov.br/v3/consulta.php?edtcodbarras=1157461&chkboxherbario[]=RB
Orchidaceae	Gomesa majevskyae	(Toscano & V.P.Castro) M.W.Chase & N.H.Williams	Native	NA	Herb	A	VI	Couto et al. 2017
Orchidaceae	Gomesa ramosa	(Lindl.) M.W.Chase & N.H.Williams	Native	NA	Herb	F, EC	VI	Fontana, A.P. 6036 (RB)	http://jabot.jbrj.gov.br/v3/consulta.php?edtcodbarras=RB01368791&chkboxherbario[]=RB
Orchidaceae	Gomesa uniflora	(Booth ex Lindl.) M.W.Chase & N.H.Williams	Native	NA	Herb	A	VI, S	Couto et al. 2017
Orchidaceae	Habenaria parviflora	Lindl.	Native	NA	Herb	A	VI	Couto et al. 2017
Orchidaceae	Habenaria rupicola	Barb.Rodr.	Native	NA	Herb	C	VI	Forzza, R.C. 6046 (RB)	http://jabot.jbrj.gov.br/v3/consulta.php?edtcodbarras=RB00621472&chkboxherbario[]=RB
Orchidaceae	Isochilus brasiliensis	Schltr.	Native	NA	Herb	A	VI, S	Couto et al. 2017
Orchidaceae	Laelia gloriosa	(Rchb.f.) L.O.Williams	Native	NA	Herb	F, EC	VI	Couto, D.R. 602 (VIES)	http://floradobrasil.jbrj.gov.br/reflora/geral/ExibeFiguraFSIUC/ExibeFiguraFSIUC.do?idFigura=122986713
Orchidaceae	Maxillaria marginata	(Lindl.) Fenzl	Native	NA	Herb	F, A	VI	Couto et al. 2017
Orchidaceae	Octomeria crassifolia	Lindl.	Native	NA	Herb	A	VI, S	Couto et al. 2017
Orchidaceae	Octomeria praestans	Barb.Rodr.	Native	NT	Herb	EC	VI	Saddi, E.M. 201 (RB)	http://jabot.jbrj.gov.br/v3/consulta.php?edtcodbarras=526453&chkboxherbario[]=RB
Orchidaceae	Octomeria tricolor	Rchb.f.	Native	NA	Herb	A	VI	Couto et al. 2017
Orchidaceae	Pabstiella muricatifolia	Fraga & L.Kollmann	Native	NA	Herb	EC	VI, S	Demuner, V. 2246 (RB)	http://jabot.jbrj.gov.br/v3/consulta.php?edtcodbarras=597361&chkboxherbario[]=RB
Orchidaceae	Polystachya concreta	(Jacq.) Garay & Sweet	Native	NA	Herb	EC	VI	Saddi, E.M. 224 (RB)	http://jabot.jbrj.gov.br/v3/consulta.php?edtcodbarras=526454&chkboxherbario[]=RB
Orchidaceae	Prescottia montana	Barb.Rodr.	Native	NA	Herb	C	VI	de Paula, L.F.A. 333 (RB)	http://jabot.jbrj.gov.br/v3/consulta.php?edtcodbarras=803884&chkboxherbario[]=RB
Orchidaceae	Prescottia oligantha	(Sw.) Lindl.	Native	NA	Herb	F, EC	VI, S	Sucre, D. 1651 (RB)	http://jabot.jbrj.gov.br/v3/consulta.php?edtcodbarras=259399&chkboxherbario[]=RB
Orchidaceae	Prescottia plantaginifolia	Lindl. ex Hook.	Native	NA	Herb	F, A	VI, S	Couto et al. 2017
Orchidaceae	Prescottia spiranthophylla	Barb.Rodr.	Native	NA	Herb	F, EC	VI	Braga, J.M.A. 3562 (RB)	http://jabot.jbrj.gov.br/v3/consulta.php?edtcodbarras=679264&chkboxherbario[]=RB
Orchidaceae	Prescottia stachyodes	(Sw.) Lindl.	Native	NA	Herb	A	VI	Meirelles et al. 1999
Orchidaceae	Pseudolaelia aromatica	Campacci	Native	NA	Herb	F, EC	VI	Leito, R.V. 1964 (SP)
Orchidaceae	Pseudolaelia ataleiensis	Campacci	Native	NA	Herb	F, EC	VI	Leito, R.V. 1959 (SP)
Orchidaceae	Pseudolaelia brejetubensis	M.Frey	Native	CR	Herb	EC	VI	Frey, M. 30 (RB)	http://jabot.jbrj.gov.br/v3/consulta.php?edtcodbarras=542702&chkboxherbario[]=RB
Orchidaceae	Pseudolaelia canaanensis	(Ruschi) F.Barros	Native	VU	Herb	F, C	VI	Menini Neto, L. 758 (RB)	http://jabot.jbrj.gov.br/v3/consulta.php?edtcodbarras=567192&chkboxherbario[]=RB
Orchidaceae	Pseudolaelia citrina	Pabst	Native	EN	Herb	F, A	VI	Pena and Alves-Araújo 2017
Orchidaceae	Pseudolaelia corcovadensis	Porto & Brade	Native	NA	Herb	F, EC	VI	Voll, O. s.n. (RB 26626)	http://jabot.jbrj.gov.br/v3/consulta.php?edtcodbarras=RB00567316&chkboxherbario[]=RB
Orchidaceae	Pseudolaelia dutrae	Ruschi	Native	VU	Herb	F, C	VI	Menini Neto, L. 756 (RB)	http://jabot.jbrj.gov.br/v3/consulta.php?edtcodbarras=567190&chkboxherbario[]=RB
Orchidaceae	Pseudolaelia geraensis	Pabst	Native	NA	Herb	F, C	VI	de Paula, L.F.A. 991 (RB)	http://jabot.jbrj.gov.br/v3/consulta.php?edtcodbarras=1115459&chkboxherbario[]=RB
Orchidaceae	Pseudolaelia pitengoensis	Campacci	Native	NA	Herb	F, C	VI	Menini Neto, L. 760 (RB)	http://jabot.jbrj.gov.br/v3/consulta.php?edtcodbarras=567194&chkboxherbario[]=RB
Orchidaceae	Pseudolaelia vellozicola	(Hoehne) Porto & Brade	Native	LC	Herb	F, C	VI	Menini Neto, L. 757 (RB)	http://jabot.jbrj.gov.br/v3/consulta.php?edtcodbarras=RB00567191&chkboxherbario[]=RB
Orchidaceae	Rhetinantha notylioglossa	(Rchb.f.) M.A.Blanco	Native	NA	Herb	A	VI	Couto et al. 2017
Orchidaceae	Sacoila lanceolata	(Aubl.) Garay	Native	NA	Herb	F, A	VI, S	Couto et al. 2017
Orchidaceae	Scaphyglottis modesta	(Rchb.f.) Schltr.	Native	NA	Herb	A	VI	Couto et al. 2017
Orchidaceae	Vanilla bahiana	Hoehne	Native	NA	Liana/Vine	C	VI, S	Cardoso, L.J.T. 77 (RB)	http://jabot.jbrj.gov.br/v3/consulta.php?edtcodbarras=RB00260059&chkboxherbario[]=RB
Orchidaceae	Vanilla chamissonis	Klotzsch	Native	LC	Herb	EC	VI	Pessanha, A.S. 48 (HUENF)	http://jabot.jbrj.gov.br/v3/consulta.php?edtcodbarras=HUENF00005774&chkboxherbario[]=HUENF
Orchidaceae	Zygopetalum maculatum	(Kunth) Garay	Native	LC	Herb	A	VI	Pena and Alves-Araújo 2017
Orobanchaceae	Esterhazya splendida	J.C.Mikan	Native	NA	Shrub; Herb; Subshrub	A	VI	Couto et al. 2017
Phyllanthaceae	Margaritaria nobilis	L.f.	Native	LC	Shrub	EC	VI, S	Fontes, E.N. 14 (RB)	http://jabot.jbrj.gov.br/v3/consulta.php?edtcodbarras=RB00807511&chkboxherbario[]=RB
Phyllanthaceae	Phyllanthus subemarginatus	Müll.Arg.	Native	NA	Subshrub	C	VI, S	de Paula, L.F.A. 952 (RB)	http://jabot.jbrj.gov.br/v3/consulta.php?edtcodbarras=1115416&chkboxherbario[]=RB
Piperaceae	Peperomia ciliato-caespitosa	Carv.-Silva & E.F.Guim.	Native	NA	Herb	F, C	VI	Kollmann, L. 10684 (RB)	http://jabot.jbrj.gov.br/v3/consulta.php?edtcodbarras=522059&chkboxherbario[]=RB
Piperaceae	Peperomia galioides	Kunth	Native	NA	Herb	A	VI	Couto et al. 2017
Piperaceae	Peperomia incana	(Haw.) Hook.	Native	NA	Herb	C	VI	Fraga, C.N. 3289 (RB)	http://jabot.jbrj.gov.br/v3/consulta.php?edtcodbarras=859239&chkboxherbario[]=RB
Plantaginaceae	Achetaria crenata	(Ronse & Philcox) V.C.Souza	Native	NA	Shrub; Herb; Subshrub	C	VI	Mauad, L.P. 313 (RB)	http://jabot.jbrj.gov.br/v3/consulta.php?edtcodbarras=1115555&chkboxherbario[]=RB
Plantaginaceae	Achetaria platychila	(Radlk.) V.C.Souza	Native	NA	Shrub; Herb; Subshrub	C	VI	de Paula, L.F.A. 954 (RB)	http://jabot.jbrj.gov.br/v3/consulta.php?edtcodbarras=1115418&chkboxherbario[]=RB
Plantaginaceae	Scoparia dulcis	L.	Native	NA	Herb; Subshrub	F, C	VI	de Paula, L.F.A. 1066 (RB)	http://jabot.jbrj.gov.br/v3/consulta.php?edtcodbarras=1157465&chkboxherbario[]=RB
Poaceae	Andropogon bicornis	L.	Native	NA	Herb	C	VI	de Paula, L.F.A. 802 (RB)	http://jabot.jbrj.gov.br/v3/consulta.php?edtcodbarras=1142554&chkboxherbario[]=RB
Poaceae	Andropogon selloanus	(Hack.) Hack.	Native	NA	Herb	C	VI	Azevedo, L.O. 396 (RB)	http://jabot.jbrj.gov.br/v3/consulta.php?edtcodbarras=1115638&chkboxherbario[]=RB
Poaceae	Apochloa lutzii	(Swallen) Zuloaga & Morrone	Native	NA	Herb	F, C	VI	Azevedo, L.O. 398 (RB)	http://jabot.jbrj.gov.br/v3/consulta.php?edtcodbarras=1115640&chkboxherbario[]=RB
Poaceae	Axonopus graniticola	P.L. Viana	Native	NA	Herb	F, C	VI	de Paula, L.F.A. 877 (RB)	http://jabot.jbrj.gov.br/v3/consulta.php?edtcodbarras=1115687&chkboxherbario[]=RB
Poaceae	Digitaria insularis	(L.) Fedde	Naturalized	NA	Herb	EC	VI	Bocayuva, M. 97 (RB)	http://jabot.jbrj.gov.br/v3/consulta.php?edtcodbarras=614357&chkboxherbario[]=RB
Poaceae	Echinolaena inflexa	(Poir.) Chase	Native	NA	Herb	F, C	VI	Kollmann, L. 7417 (MBML)	http://reflora.jbrj.gov.br/reflora/geral/ExibeFiguraFSIUC/ExibeFiguraFSIUC.do?idFigura=230230705
Poaceae	Ichnanthus bambusiflorus	(Trin.) Döll	Native	LC	Herb	C	VI	Amorim, A. 7183 (RB)	http://jabot.jbrj.gov.br/v3/consulta.php?edtcodbarras=RB00521254&chkboxherbario[]=RB
Poaceae	Ichnanthus dasycoleus	Tutin	Native	NA	Herb	C	VI, S	de Paula, L.F.A. 356 (RB)	http://jabot.jbrj.gov.br/v3/consulta.php?edtcodbarras=RB00798900&chkboxherbario[]=RB
Poaceae	Ichnanthus lancifolius	Mez	Native	NA	Herb	A	VI, S	Pena and Alves-Araújo 2017
Poaceae	Megathyrsus maximus	(Jacq.) B.K.Simon & S.W.L.Jacobs	Naturalized	NA	Shrub; Herb	A	VI	Meirelles et al. 1999
Poaceae	Melinis minutiflora	P.Beauv.	Naturalized	NA	Herb	C	VI, S	de Paula, L.F.A. 1068 (RB)	http://jabot.jbrj.gov.br/v3/consulta.php?edtcodbarras=1157467&chkboxherbario[]=RB
Poaceae	Melinis repens	(Willd.) Zizka	Naturalized	NA	Herb	C	VI, S	de Paula, L.F.A. 996 (RB)	http://jabot.jbrj.gov.br/v3/consulta.php?edtcodbarras=1115464&chkboxherbario[]=RB
Poaceae	Paspalum coryphaeum	Trin.	Native	NA	Herb	C	VI	de Paula, L.F.A. 993 (RB)	http://jabot.jbrj.gov.br/v3/consulta.php?edtcodbarras=1115461&chkboxherbario[]=RB
Poaceae	Paspalum notatum	Flüggé	Native	NA	Herb	A	VI	Meirelles et al. 1999
Poaceae	Paspalum paniculatum	L.	Native	NA	Herb	C	VI	de Paula, L.F.A. 678 (BHCB)
Poaceae	Paspalum pilosum	Lam.	Native	NA	Herb	C	VI	Azevedo, L.O. 394 (RB)	http://jabot.jbrj.gov.br/v3/consulta.php?edtcodbarras=1115636&chkboxherbario[]=RB
Poaceae	Setaria parviflora	(Poir.) Kerguélen	Native	NA	Herb	EC	VI	Barros, A.A.M. 1029 (RB)	http://jabot.jbrj.gov.br/v3/consulta.php?edtcodbarras=767617&chkboxherbario[]=RB
Polygalaceae	Bredemeyera atlantica	M.Mota & J.F.B.Pastore	Native	NA	Liana/Vine	C	VI, S	Fraga, C.N. 3771 (RB)	http://jabot.jbrj.gov.br/v3/consulta.php?edtcodbarras=1420249&chkboxherbario[]=RB
Polygalaceae	Polygala glochidata	Kunth	Native	NA	Herb; Subshrub	C	VI	Forzza, R.C. 6048 (RB)	http://jabot.jbrj.gov.br/v3/consulta.php?edtcodbarras=621479&chkboxherbario[]=RB
Polygalaceae	Polygala paniculata	L.	Native	NA	Herb; Subshrub	C	VI	Azevedo, L.O. 399 (RB)	http://jabot.jbrj.gov.br/v3/consulta.php?edtcodbarras=1115641&chkboxherbario[]=RB
Portulacaceae	Portulaca hirsutissima	Cambess.	Native	NA	Herb	F, C	VI	de Paula, L.F.A. 1121 (RB)	http://jabot.jbrj.gov.br/v3/consulta.php?edtcodbarras=1232770&chkboxherbario[]=RB
Portulacaceae	Portulaca mucronata	Link	Native	NA	Herb	F, EC	VI	Braga, J.M.A. 657 (RB)	http://jabot.jbrj.gov.br/v3/consulta.php?edtcodbarras=676718&chkboxherbario[]=RB
Portulacaceae	Portulaca oleracea	L.	Naturalized	NA	Herb	C	VI	Mauad, L.P. 162 (HUENF)	http://jabot.jbrj.gov.br/v3/visualizadorimagem.php?siglacolbotorigem=HUENF&codigobarras=HUENF00005446
Portulacaceae	Portulaca pilosa	L.	Native	NA	Herb	A	VI	Pena and Alves-Araújo 2017
Primulaceae	Myrsine venosa	A.DC.	Native	NA	Shrub; Tree	A	VI, S	Couto et al. 2017
Rubiaceae	Borreria capitata	(Ruiz & Pav.) DC.	Native	NA	Herb; Subshrub	F, A	VI, S	Pena and Alves-Araújo 2017
Rubiaceae	Borreria cupularis	DC.	Native	NA	Herb; Subshrub	A	VI	Pena and Alves-Araújo 2017
Rubiaceae	Borreria ocymifolia	(Roem. & Schult.) Bacigalupo & E.L.Cabral	Native	NA	Herb; Subshrub	C	VI	de Paula, L.F.A. 928 (RB)	http://jabot.jbrj.gov.br/v3/consulta.php?edtcodbarras=1115388&chkboxherbario[]=RB
Rubiaceae	Borreria verticillata	(L.) G.Mey.	Native	NA	Subshrub	F, C	VI, S	Mauad, L.P. 26 (RB)	http://jabot.jbrj.gov.br/v3/consulta.php?edtcodbarras=694909&chkboxherbario[]=RB
Rubiaceae	Bradea borrerioides	J.A.Oliveira & Sobrado	Native	NA	Shrub; Herb; Subshrub	C	VI, S	Forzza, R.C. 7790 (RB)	http://jabot.jbrj.gov.br/v3/consulta.php?edtcodbarras=856280&chkboxherbario[]=RB
Rubiaceae	Bradea brasiliensis	Standl.	Native	NA	Shrub	F, C	VI, S	Azevedo, L.O. 474 (RB)	http://jabot.jbrj.gov.br/v3/consulta.php?edtcodbarras=1115764&chkboxherbario[]=RB
Rubiaceae	Bradea kuhlmannii	Brade	Native	DD	Shrub	F, C	VI	Fraga, C.N. 3486 (RB)	http://jabot.jbrj.gov.br/v3/consulta.php?edtcodbarras=1202715&chkboxherbario[]=RB
Rubiaceae	Emmeorhiza umbellata	(Spreng.) K.Schum.	Native	NA	Liana/Vine	C	VI, S	Cardoso, L.J.T. 470 (RB)	http://jabot.jbrj.gov.br/v3/consulta.php?edtcodbarras=1142899&chkboxherbario[]=RB
Rubiaceae	Hexasepalum teres	(Walter) J.H. Kirkbr.	Native	NA	Herb; Subshrub	C	VI	Azevedo, L.O. 484 (RB)	http://jabot.jbrj.gov.br/v3/consulta.php?edtcodbarras=1115774&chkboxherbario[]=RB
Solanaceae	Melananthus fasciculatus	(Benth.) Soler.	Native	NA	Shrub	C	VI	de Paula, L.F.A. 927 (RB)	http://jabot.jbrj.gov.br/v3/consulta.php?edtcodbarras=1115387&chkboxherbario[]=RB
Solanaceae	Schwenckia nova-veneciana	Carvalho	Native	CR	Shrub	F, C	VI, S	Azevedo, L.O. 473 (RB)	http://jabot.jbrj.gov.br/v3/consulta.php?edtcodbarras=1115763&chkboxherbario[]=RB
Solanaceae	Solanum americanum	Mill.	Native	NA	Herb	F, A	VI, S	Pena and Alves-Araújo 2017
Solanaceae	Solanum kollastrum	Gouvêa & Giacomin	Native	NA	Shrub	C	VI, S	de Paula, L.F.A. 1180 (RB)	http://jabot.jbrj.gov.br/v3/consulta.php?edtcodbarras=1384894&chkboxherbario[]=RB
Solanaceae	Solanum swartzianum	Roem. & Schult.	Native	NA	Tree	A	VI	Couto et al. 2017
Talinaceae	Talinum fruticosum	(L.) Juss.	Native	NA	Herb	F, EC	VI, S	Gurtler, J. 406 (VIES)	http://floradobrasil.jbrj.gov.br/reflora/geral/ExibeFiguraFSIUC/ExibeFiguraFSIUC.do?idFigura=201183148
Talinaceae	Talinum paniculatum	(Jacq.) Gaertn.	Native	NA	Herb	F, C	VI	de Paula, L.F.A. 1184 (RB)	http://jabot.jbrj.gov.br/v3/consulta.php?edtcodbarras=1384897&chkboxherbario[]=RB
Turneraceae	Turnera involucrata	Arbo	Native	NA	Shrub	F, EC	VI, S	Demuner, V. 3432 (RB)	http://jabot.jbrj.gov.br/v3/consulta.php?edtcodbarras=RB00582328&chkboxherbario[]=RB
Turneraceae	Turnera rubrobracteata	Arbo	Native	NA	Shrub; Subshrub	F, A	VI	Pena and Alves-Araújo 2017
Urticaceae	Cecropia pachystachya	Trécul	Native	NA	Tree	A	VI	Santos et al. 2010
Urticaceae	Pilea microphylla	(L.) Liebm.	Naturalized	NA	Herb	F, EC	VI	Fontana, A.P. 4871 (RB)	http://jabot.jbrj.gov.br/v3/consulta.php?edtcodbarras=525427&chkboxherbario[]=RB
Velloziaceae	Barbacenia pabstiana	L.B.Sm. & Ayensu	Native	NA	Herb	F, EC	VI	Forzza, R.C. 7527 (RB)	http://jabot.jbrj.gov.br/v3/consulta.php?edtcodbarras=810041&chkboxherbario[]=RB
Velloziaceae	Barbacenia purpurea	Hook.	Native	NA	Herb	F, EC	VI	Fraga, C.N. 3290 (RB)	http://jabot.jbrj.gov.br/v3/consulta.php?edtcodbarras=859240&chkboxherbario[]=RB
Velloziaceae	Barbacenia rogieri	T.Moore & Ayres	Native	NA	Herb	F, C	VI	de Paula, L.F.A. 985 (RB)	http://jabot.jbrj.gov.br/v3/consulta.php?edtcodbarras=RB01115453&chkboxherbario[]=RB
Velloziaceae	Barbacenia spectabilis	L.B.Sm. & Ayensu	Native	EN	Herb	F, EC	VI	Oliveira-Filho, E.C. 3 (US)	http://floradobrasil.jbrj.gov.br/reflora/geral/ExibeFiguraFSIUC/ExibeFiguraFSIUC.do?idFigura=100275617
Velloziaceae	Barbacenia squamata	Herb.	Native	NA	Herb	F, EC	VI	Brade, A.C. 16846 (RB)	http://jabot.jbrj.gov.br/v3/consulta.php?edtcodbarras=635588&chkboxherbario[]=RB
Velloziaceae	Barbacenia tomentosa	Mart.	Native	NA	Herb	F, C	VI	de Paula, L.F.A. 146 (RB)	http://jabot.jbrj.gov.br/v3/consulta.php?edtcodbarras=RB00799347&chkboxherbario[]=RB
Velloziaceae	Vellozia albiflora	Pohl	Native	NT	Herb; Subshrub	F, A	VI	Monteiro, R.F. 300 (RB)	http://jabot.jbrj.gov.br/v3/consulta.php?edtcodbarras=RB00516831&chkboxherbario[]=RB
Velloziaceae	Vellozia bahiana	L.B.Sm. & Ayensu	Native	NA	Subshrub	F, EC	VI	Maia, W. s.n. (SP 110129)
Velloziaceae	Vellozia candida	J.C.Mikan	Native	NA	Shrub; Herb; Subshrub	F, C	VI	de Paula, L.F.A. 905 (RB)	http://jabot.jbrj.gov.br/v3/consulta.php?edtcodbarras=1115715&chkboxherbario[]=RB
Velloziaceae	Vellozia plicata	Mart.	Native	NA	Shrub; Subshrub	F, C	VI	de Paula, L.F.A. 1148 (RB)	http://jabot.jbrj.gov.br/v3/consulta.php?edtcodbarras=1384898&chkboxherbario[]=RB
Velloziaceae	Vellozia pulchra	L.B.Sm.	Native	EN	Subshrub	F, C	VI	de Paula, L.F.A. 1085 (RB)	http://jabot.jbrj.gov.br/v3/consulta.php?edtcodbarras=1115495&chkboxherbario[]=RB
Velloziaceae	Vellozia variegata	Goethart & Henrard	Native	NA	Subshrub	F, C	VI	Forzza, R.C. 8781 (RB)	http://jabot.jbrj.gov.br/v3/consulta.php?edtcodbarras=1115549&chkboxherbario[]=RB
Verbenaceae	Lantana camara	L.	Naturalized	NA	Shrub; Tree; Subshrub	A	VI, S	Pena and Alves-Araújo 2017
Verbenaceae	Lantana tiliaefolia	Cham.	Native	NA	Herb; Subshrub	EC	VI, S	Amorim, A. 7178 (RB)	http://jabot.jbrj.gov.br/v3/consulta.php?edtcodbarras=RB00521247&chkboxherbario[]=RB
Verbenaceae	Lippia diversifolia	P.H.Cardoso & Salimena	Native	NA	Shrub	EC	VI, S	Monteiro, R.F. 303 (RB)	http://jabot.jbrj.gov.br/v3/consulta.php?edtcodbarras=RB00516833&chkboxherbario[]=RB
Verbenaceae	Lippia origanoides	Kunth	Native	NA	Herb; Subshrub	C	VI, S	Fraga, C.N. 2537 (RB)	http://jabot.jbrj.gov.br/v3/consulta.php?edtcodbarras=RB00557977&chkboxherbario[]=RB
Verbenaceae	Stachytarpheta cayennensis	(Rich.) Vahl	Native	NA	Herb; Subshrub	A	VI, S	Couto et al. 2017
Verbenaceae	Stachytarpheta gesnerioides	Cham.	Native	NA	Herb; Subshrub	C	VI, S	Forzza, R.C. 5795 (RB)	http://jabot.jbrj.gov.br/v3/consulta.php?edtcodbarras=RB00591227&chkboxherbario[]=RB
Verbenaceae	Stachytarpheta tomentosa	P.H.Cardoso & Salimena	Native	NA	Herb; Subshrub	C	VI, S	Forzza, R.C. 7530 (RB)	http://jabot.jbrj.gov.br/v3/consulta.php?edtcodbarras=RB00810044&chkboxherbario[]=RB
Violaceae	Rinorea laevigata	(Sol. ex Ging.) Hekking	Native	NA	Tree	EC	VI, S	Silva, T.A. 47 (RB)	http://jabot.jbrj.gov.br/v3/consulta.php?edtcodbarras=679366&chkboxherbario[]=RB
References Couto, D.R., Francisco, T.M., Manhães, V.C., Dias, H.M., Pereira, M.C. A. 2017. Floristic composition of a Neotropical inselberg from Espírito Santo state, Brazil: an important area for conservation. Check List 13: 2043. Meirelles, S.T., Pivello, V.R., Joly, C.A. 1999. The vegetation of granite rock outcrops in Rio d.e Janeiro, Brazil, and the need for its protection. Environmental Con…
